# Supplementary material for: Association between clinical dementia rating and clinical outcomes in Alzheimer's disease
Source: PubMed Central journal article supplement — Alzheimers Dement (Amst). 2024 Jan 17;16(1):e12522. doi: 10.1002/dad2.12522 (PMC10794857; doi:10.1002/dad2.12522), 2024-01-17
Supplement: DAD2-16-e12522-s001.pdf [file DAD2-16-e12522-s001.pdf]

## ICMJE DISCLOSURE FORM

**Date:** 11/2/2023

**Your Name:** Krista L. Lanctôt

**Manuscript Title:** The Association Between Clinical Dementia Rating and Clinical Outcomes in Alzheimer's Disease

**Manuscript Number (if known):** DADM-D-23-00125

In the interest of transparency, we ask you to disclose all relationships/activities/interests listed below that are related to the content of your manuscript. "Related" means any relation with for-profit or not-for-profit third parties whose interests may be affected by the content of the manuscript. Disclosure represents a commitment to transparency and does not necessarily indicate a bias. If you are in doubt about whether to list a relationship/activity/interest, it is preferable that you do so.

The author's relationships/activities/interests should be defined broadly. For example, if your manuscript pertains to the epidemiology of hypertension, you should declare all relationships with manufacturers of antihypertensive medication, even if that medication is not mentioned in the manuscript.

In item #1 below, report all support for the work reported in this manuscript without time limit. For all other items, the time frame for disclosure is the past 36 months.

|                                                           |                                                                                                                                                                                | Name all entities with whom you have this relationship or indicate none (add rows as needed) | Specifications/Comments (e.g., if payments were made to you or to your institution)                                                                                                                                                                                                                                                                                                                                                                                                                                                                                                                                                                                                                                                                                                                                             |                                        |                     |                                       |                     |                                                    |                     |                        |                     |                         |                     |                   |                     |                             |                     |                      |                     |                      |                     |
|-----------------------------------------------------------|--------------------------------------------------------------------------------------------------------------------------------------------------------------------------------|----------------------------------------------------------------------------------------------|---------------------------------------------------------------------------------------------------------------------------------------------------------------------------------------------------------------------------------------------------------------------------------------------------------------------------------------------------------------------------------------------------------------------------------------------------------------------------------------------------------------------------------------------------------------------------------------------------------------------------------------------------------------------------------------------------------------------------------------------------------------------------------------------------------------------------------|----------------------------------------|---------------------|---------------------------------------|---------------------|----------------------------------------------------|---------------------|------------------------|---------------------|-------------------------|---------------------|-------------------|---------------------|-----------------------------|---------------------|----------------------|---------------------|----------------------|---------------------|
| <b>Time frame: Since the initial planning of the work</b> |                                                                                                                                                                                |                                                                                              |                                                                                                                                                                                                                                                                                                                                                                                                                                                                                                                                                                                                                                                                                                                                                                                                                                 |                                        |                     |                                       |                     |                                                    |                     |                        |                     |                         |                     |                   |                     |                             |                     |                      |                     |                      |                     |
| <b>1</b>                                                  | All support for the present manuscript (e.g., funding, provision of study materials, medical writing, article processing charges, etc.)<br><b>No time limit for this item.</b> | <input type="checkbox"/> <b>None</b>                                                         | <table border="1" style="width: 100%; border-collapse: collapse;"> <tr> <td style="width: 50%;">Evidera PPD</td> <td>Medical writing</td> </tr> <tr> <td> </td> <td> </td> </tr> <tr> <td colspan="2" style="text-align: center; font-size: small;">Click the tab key to add additional rows.</td> </tr> </table>                                                                                                                                                                                                                                                                                                                                                                                                                                                                                                               | Evidera PPD                            | Medical writing     |                                       |                     | Click the tab key to add additional rows.          |                     |                        |                     |                         |                     |                   |                     |                             |                     |                      |                     |                      |                     |
| Evidera PPD                                               | Medical writing                                                                                                                                                                |                                                                                              |                                                                                                                                                                                                                                                                                                                                                                                                                                                                                                                                                                                                                                                                                                                                                                                                                                 |                                        |                     |                                       |                     |                                                    |                     |                        |                     |                         |                     |                   |                     |                             |                     |                      |                     |                      |                     |
|                                                           |                                                                                                                                                                                |                                                                                              |                                                                                                                                                                                                                                                                                                                                                                                                                                                                                                                                                                                                                                                                                                                                                                                                                                 |                                        |                     |                                       |                     |                                                    |                     |                        |                     |                         |                     |                   |                     |                             |                     |                      |                     |                      |                     |
| Click the tab key to add additional rows.                 |                                                                                                                                                                                |                                                                                              |                                                                                                                                                                                                                                                                                                                                                                                                                                                                                                                                                                                                                                                                                                                                                                                                                                 |                                        |                     |                                       |                     |                                                    |                     |                        |                     |                         |                     |                   |                     |                             |                     |                      |                     |                      |                     |
| <b>Time frame: past 36 months</b>                         |                                                                                                                                                                                |                                                                                              |                                                                                                                                                                                                                                                                                                                                                                                                                                                                                                                                                                                                                                                                                                                                                                                                                                 |                                        |                     |                                       |                     |                                                    |                     |                        |                     |                         |                     |                   |                     |                             |                     |                      |                     |                      |                     |
| <b>2</b>                                                  | Grants or contracts from any entity (if not indicated in item #1 above).                                                                                                       | <input type="checkbox"/> <b>None</b>                                                         | <table border="1" style="width: 100%; border-collapse: collapse;"> <tr> <td style="width: 50%;">Canadian Institutes of Health Research</td> <td>Paid to institution</td> </tr> <tr> <td>Alzheimer's Drug Discovery Foundation</td> <td>Paid to institution</td> </tr> <tr> <td>Canadian Consortium for Neurodegeneration in Aging</td> <td>Paid to institution</td> </tr> <tr> <td>Pooler Charitable Fund</td> <td>Paid to institution</td> </tr> <tr> <td>Alzheimer's Association</td> <td>Paid to institution</td> </tr> <tr> <td>Weston Foundation</td> <td>Paid to institution</td> </tr> <tr> <td>National Institute on Aging</td> <td>Paid to institution</td> </tr> <tr> <td>Cerevel Therapeutics</td> <td>Paid to institution</td> </tr> <tr> <td>Jazz Pharmaceuticals</td> <td>Paid to institution</td> </tr> </table> | Canadian Institutes of Health Research | Paid to institution | Alzheimer's Drug Discovery Foundation | Paid to institution | Canadian Consortium for Neurodegeneration in Aging | Paid to institution | Pooler Charitable Fund | Paid to institution | Alzheimer's Association | Paid to institution | Weston Foundation | Paid to institution | National Institute on Aging | Paid to institution | Cerevel Therapeutics | Paid to institution | Jazz Pharmaceuticals | Paid to institution |
| Canadian Institutes of Health Research                    | Paid to institution                                                                                                                                                            |                                                                                              |                                                                                                                                                                                                                                                                                                                                                                                                                                                                                                                                                                                                                                                                                                                                                                                                                                 |                                        |                     |                                       |                     |                                                    |                     |                        |                     |                         |                     |                   |                     |                             |                     |                      |                     |                      |                     |
| Alzheimer's Drug Discovery Foundation                     | Paid to institution                                                                                                                                                            |                                                                                              |                                                                                                                                                                                                                                                                                                                                                                                                                                                                                                                                                                                                                                                                                                                                                                                                                                 |                                        |                     |                                       |                     |                                                    |                     |                        |                     |                         |                     |                   |                     |                             |                     |                      |                     |                      |                     |
| Canadian Consortium for Neurodegeneration in Aging        | Paid to institution                                                                                                                                                            |                                                                                              |                                                                                                                                                                                                                                                                                                                                                                                                                                                                                                                                                                                                                                                                                                                                                                                                                                 |                                        |                     |                                       |                     |                                                    |                     |                        |                     |                         |                     |                   |                     |                             |                     |                      |                     |                      |                     |
| Pooler Charitable Fund                                    | Paid to institution                                                                                                                                                            |                                                                                              |                                                                                                                                                                                                                                                                                                                                                                                                                                                                                                                                                                                                                                                                                                                                                                                                                                 |                                        |                     |                                       |                     |                                                    |                     |                        |                     |                         |                     |                   |                     |                             |                     |                      |                     |                      |                     |
| Alzheimer's Association                                   | Paid to institution                                                                                                                                                            |                                                                                              |                                                                                                                                                                                                                                                                                                                                                                                                                                                                                                                                                                                                                                                                                                                                                                                                                                 |                                        |                     |                                       |                     |                                                    |                     |                        |                     |                         |                     |                   |                     |                             |                     |                      |                     |                      |                     |
| Weston Foundation                                         | Paid to institution                                                                                                                                                            |                                                                                              |                                                                                                                                                                                                                                                                                                                                                                                                                                                                                                                                                                                                                                                                                                                                                                                                                                 |                                        |                     |                                       |                     |                                                    |                     |                        |                     |                         |                     |                   |                     |                             |                     |                      |                     |                      |                     |
| National Institute on Aging                               | Paid to institution                                                                                                                                                            |                                                                                              |                                                                                                                                                                                                                                                                                                                                                                                                                                                                                                                                                                                                                                                                                                                                                                                                                                 |                                        |                     |                                       |                     |                                                    |                     |                        |                     |                         |                     |                   |                     |                             |                     |                      |                     |                      |                     |
| Cerevel Therapeutics                                      | Paid to institution                                                                                                                                                            |                                                                                              |                                                                                                                                                                                                                                                                                                                                                                                                                                                                                                                                                                                                                                                                                                                                                                                                                                 |                                        |                     |                                       |                     |                                                    |                     |                        |                     |                         |                     |                   |                     |                             |                     |                      |                     |                      |                     |
| Jazz Pharmaceuticals                                      | Paid to institution                                                                                                                                                            |                                                                                              |                                                                                                                                                                                                                                                                                                                                                                                                                                                                                                                                                                                                                                                                                                                                                                                                                                 |                                        |                     |                                       |                     |                                                    |                     |                        |                     |                         |                     |                   |                     |                             |                     |                      |                     |                      |                     |

|                      |                                                                                                              | Name all entities with whom you have this relationship or indicate none (add rows as needed) | Specifications/Comments (e.g., if payments were made to you or to your institution)                          |
|----------------------|--------------------------------------------------------------------------------------------------------------|----------------------------------------------------------------------------------------------|--------------------------------------------------------------------------------------------------------------|
| 3                    | Royalties or licenses                                                                                        | <input type="checkbox"/> None                                                                |                                                                                                              |
|                      |                                                                                                              | Oxford University Press                                                                      | Royalties for sale of book "Apathy, Clinical and Neuroscientific Perspectives from Neurology and Psychiatry" |
|                      |                                                                                                              |                                                                                              |                                                                                                              |
| 4                    | Consulting fees                                                                                              | <input type="checkbox"/> None                                                                |                                                                                                              |
|                      |                                                                                                              | BioXcel Therapeutics                                                                         | Paid to me                                                                                                   |
|                      |                                                                                                              | Bright Minds                                                                                 | Paid to me                                                                                                   |
|                      |                                                                                                              | Cerevel Therapeutics                                                                         | Paid to me                                                                                                   |
|                      |                                                                                                              | Eisai Co. Ltd                                                                                | Paid to me                                                                                                   |
|                      |                                                                                                              | Exciva                                                                                       | Paid to me                                                                                                   |
|                      |                                                                                                              | ICG Pharma                                                                                   | Paid to me                                                                                                   |
|                      |                                                                                                              | Jazz Pharmaceuticals                                                                         | Paid to me                                                                                                   |
|                      |                                                                                                              | Kondor Pharma                                                                                | Paid to me                                                                                                   |
|                      |                                                                                                              | H Lundbeck A/S                                                                               | Paid to me                                                                                                   |
|                      |                                                                                                              | Merck                                                                                        | Paid to me                                                                                                   |
|                      |                                                                                                              | Novo Nordisk                                                                                 | Paid to me                                                                                                   |
|                      |                                                                                                              | Praxis Therapeutics                                                                          | Paid to me                                                                                                   |
|                      |                                                                                                              | Sumitomo Pharma Co. Ltd.                                                                     | Paid to me                                                                                                   |
| Bristol Myers Squibb | Paid to me                                                                                                   |                                                                                              |                                                                                                              |
| 5                    | Payment or honoraria for lectures, presentations, speakers bureaus, manuscript writing or educational events | <input type="checkbox"/> None                                                                |                                                                                                              |
|                      |                                                                                                              | Novo Nordisk                                                                                 | Paid to me                                                                                                   |
|                      |                                                                                                              | H Lundbeck A/S                                                                               | Paid to me                                                                                                   |
| 6                    | Payment for expert testimony                                                                                 | <input checked="" type="checkbox"/> None                                                     |                                                                                                              |
|                      |                                                                                                              |                                                                                              |                                                                                                              |
|                      |                                                                                                              |                                                                                              |                                                                                                              |
| 7                    | Support for attending meetings and/or travel                                                                 | <input type="checkbox"/> None                                                                |                                                                                                              |
|                      |                                                                                                              | Novo Nordisk                                                                                 | Paid to vendor                                                                                               |
|                      |                                                                                                              | H Lundbeck A/S                                                                               | Paid to vendor                                                                                               |

|           |                                                                                                   | Name all entities with whom you have this relationship or indicate none (add rows as needed) | Specifications/Comments (e.g., if payments were made to you or to your institution) |
|-----------|---------------------------------------------------------------------------------------------------|----------------------------------------------------------------------------------------------|-------------------------------------------------------------------------------------|
| <b>8</b>  | Patents planned, issued or pending                                                                | <input checked="" type="checkbox"/> <b>None</b>                                              |                                                                                     |
|           |                                                                                                   |                                                                                              |                                                                                     |
|           |                                                                                                   |                                                                                              |                                                                                     |
| <b>9</b>  | Participation on a Data Safety Monitoring Board or Advisory Board                                 | <input type="checkbox"/> <b>None</b>                                                         |                                                                                     |
|           |                                                                                                   | PAS-MCI study                                                                                | Data Safety Monitoring Board, no payments                                           |
|           |                                                                                                   |                                                                                              |                                                                                     |
| <b>10</b> | Leadership or fiduciary role in other board, society, committee or advocacy group, paid or unpaid | <input type="checkbox"/> <b>None</b>                                                         |                                                                                     |
|           |                                                                                                   | American Association of Geriatric Psychiatry                                                 | Board                                                                               |
|           |                                                                                                   | International Society for CNS clinical Trials and Methodology                                | Member, Working Group Leader                                                        |
|           |                                                                                                   |                                                                                              |                                                                                     |
| <b>11</b> | Stock or stock options                                                                            | <input checked="" type="checkbox"/> <b>None</b>                                              |                                                                                     |
|           |                                                                                                   |                                                                                              |                                                                                     |
|           |                                                                                                   |                                                                                              |                                                                                     |
| <b>12</b> | Receipt of equipment, materials, drugs, medical writing, gifts or other services                  | <input checked="" type="checkbox"/> <b>None</b>                                              |                                                                                     |
|           |                                                                                                   |                                                                                              |                                                                                     |
|           |                                                                                                   |                                                                                              |                                                                                     |
| <b>13</b> | Other financial or non-financial interests                                                        | <input checked="" type="checkbox"/> <b>None</b>                                              |                                                                                     |
|           |                                                                                                   |                                                                                              |                                                                                     |
|           |                                                                                                   |                                                                                              |                                                                                     |

Please place an "X" next to the following statement to indicate your agreement:

I certify that I have answered every question and have not altered the wording of any of the questions on this form.

## ICMJE DISCLOSURE FORM

**Date:** 11/2/2023

**Your Name:** Merce Boada

**Manuscript Title:** The Association Between Clinical Dementia Rating and Clinical Outcomes in Alzheimer's Disease

**Manuscript Number (if known):** DADM-D-23-00125

In the interest of transparency, we ask you to disclose all relationships/activities/interests listed below that are related to the content of your manuscript. "Related" means any relation with for-profit or not-for-profit third parties whose interests may be affected by the content of the manuscript. Disclosure represents a commitment to transparency and does not necessarily indicate a bias. If you are in doubt about whether to list a relationship/activity/interest, it is preferable that you do so.

The author's relationships/activities/interests should be defined broadly. For example, if your manuscript pertains to the epidemiology of hypertension, you should declare all relationships with manufacturers of antihypertensive medication, even if that medication is not mentioned in the manuscript.

In item #1 below, report all support for the work reported in this manuscript without time limit. For all other items, the time frame for disclosure is the past 36 months.

|                                                    | Name all entities with whom you have this relationship or indicate none (add rows as needed)                                                                                   | Specifications/Comments (e.g., if payments were made to you or to your institution)                                                                                                                                                                                                                                                                                     |  |  |  |  |  |  |
|----------------------------------------------------|--------------------------------------------------------------------------------------------------------------------------------------------------------------------------------|-------------------------------------------------------------------------------------------------------------------------------------------------------------------------------------------------------------------------------------------------------------------------------------------------------------------------------------------------------------------------|--|--|--|--|--|--|
| Time frame: Since the initial planning of the work |                                                                                                                                                                                |                                                                                                                                                                                                                                                                                                                                                                         |  |  |  |  |  |  |
| <b>1</b>                                           | All support for the present manuscript (e.g., funding, provision of study materials, medical writing, article processing charges, etc.)<br><b>No time limit for this item.</b> | <input checked="" type="checkbox"/> <b>None</b><br><table border="1" style="width: 100%; height: 40px; margin-top: 5px;"> <tr><td style="width: 60%;"></td><td style="width: 40%;"></td></tr> <tr><td></td><td></td></tr> <tr><td></td><td></td></tr> </table> <p style="font-size: small; color: gray; margin-top: 5px;">Click the tab key to add additional rows.</p> |  |  |  |  |  |  |
|                                                    |                                                                                                                                                                                |                                                                                                                                                                                                                                                                                                                                                                         |  |  |  |  |  |  |
|                                                    |                                                                                                                                                                                |                                                                                                                                                                                                                                                                                                                                                                         |  |  |  |  |  |  |
|                                                    |                                                                                                                                                                                |                                                                                                                                                                                                                                                                                                                                                                         |  |  |  |  |  |  |
| Time frame: past 36 months                         |                                                                                                                                                                                |                                                                                                                                                                                                                                                                                                                                                                         |  |  |  |  |  |  |
| <b>2</b>                                           | Grants or contracts from any entity (if not indicated in item #1 above).                                                                                                       | <input checked="" type="checkbox"/> <b>None</b><br><table border="1" style="width: 100%; height: 40px; margin-top: 5px;"> <tr><td style="width: 60%;"></td><td style="width: 40%;"></td></tr> <tr><td></td><td></td></tr> <tr><td></td><td></td></tr> </table>                                                                                                          |  |  |  |  |  |  |
|                                                    |                                                                                                                                                                                |                                                                                                                                                                                                                                                                                                                                                                         |  |  |  |  |  |  |
|                                                    |                                                                                                                                                                                |                                                                                                                                                                                                                                                                                                                                                                         |  |  |  |  |  |  |
|                                                    |                                                                                                                                                                                |                                                                                                                                                                                                                                                                                                                                                                         |  |  |  |  |  |  |
| <b>3</b>                                           | Royalties or licenses                                                                                                                                                          | <input checked="" type="checkbox"/> <b>None</b><br><table border="1" style="width: 100%; height: 40px; margin-top: 5px;"> <tr><td style="width: 60%;"></td><td style="width: 40%;"></td></tr> <tr><td></td><td></td></tr> <tr><td></td><td></td></tr> </table>                                                                                                          |  |  |  |  |  |  |
|                                                    |                                                                                                                                                                                |                                                                                                                                                                                                                                                                                                                                                                         |  |  |  |  |  |  |
|                                                    |                                                                                                                                                                                |                                                                                                                                                                                                                                                                                                                                                                         |  |  |  |  |  |  |
|                                                    |                                                                                                                                                                                |                                                                                                                                                                                                                                                                                                                                                                         |  |  |  |  |  |  |

|    |                                                                                                              | Name all entities with whom you have this relationship or indicate none (add rows as needed)                                               | Specifications/Comments (e.g., if payments were made to you or to your institution) |
|----|--------------------------------------------------------------------------------------------------------------|--------------------------------------------------------------------------------------------------------------------------------------------|-------------------------------------------------------------------------------------|
| 4  | Consulting fees                                                                                              | <input type="checkbox"/> None                                                                                                              |                                                                                     |
|    |                                                                                                              | Grifols, Araclon Biotech, Roche, Biogen, Lilly, Merck, Zambon, Novo-Nordisk                                                                |                                                                                     |
|    |                                                                                                              |                                                                                                                                            |                                                                                     |
|    |                                                                                                              |                                                                                                                                            |                                                                                     |
| 5  | Payment or honoraria for lectures, presentations, speakers bureaus, manuscript writing or educational events | <input type="checkbox"/> None                                                                                                              |                                                                                     |
|    |                                                                                                              | Roche, Biogen, Grifols, Nutricia, Araclon Biotech, Servier, Novo-Nordisk                                                                   |                                                                                     |
|    |                                                                                                              |                                                                                                                                            |                                                                                     |
|    |                                                                                                              |                                                                                                                                            |                                                                                     |
| 6  | Payment for expert testimony                                                                                 | <input checked="" type="checkbox"/> None                                                                                                   |                                                                                     |
|    |                                                                                                              |                                                                                                                                            |                                                                                     |
|    |                                                                                                              |                                                                                                                                            |                                                                                     |
|    |                                                                                                              |                                                                                                                                            |                                                                                     |
| 7  | Support for attending meetings and/or travel                                                                 | <input checked="" type="checkbox"/> None                                                                                                   |                                                                                     |
|    |                                                                                                              |                                                                                                                                            |                                                                                     |
|    |                                                                                                              |                                                                                                                                            |                                                                                     |
|    |                                                                                                              |                                                                                                                                            |                                                                                     |
| 8  | Patents planned, issued or pending                                                                           | <input checked="" type="checkbox"/> None                                                                                                   |                                                                                     |
|    |                                                                                                              |                                                                                                                                            |                                                                                     |
|    |                                                                                                              |                                                                                                                                            |                                                                                     |
|    |                                                                                                              |                                                                                                                                            |                                                                                     |
| 9  | Participation on a Data Safety Monitoring Board or Advisory Board                                            | <input type="checkbox"/> None                                                                                                              |                                                                                     |
|    |                                                                                                              | Grifols, Roche, Lilly, Araclon Biotech, Merck, Zambon, Biogen, Novo-Nordisk, Bioiberica, Eisai, Servier, Schwabe Pharma, Lighthouse Pharma |                                                                                     |
|    |                                                                                                              |                                                                                                                                            |                                                                                     |
|    |                                                                                                              |                                                                                                                                            |                                                                                     |
| 10 | Leadership or fiduciary role in other board, society, committee or advocacy group, paid or unpaid            | <input checked="" type="checkbox"/> None                                                                                                   |                                                                                     |
|    |                                                                                                              |                                                                                                                                            |                                                                                     |
|    |                                                                                                              |                                                                                                                                            |                                                                                     |
|    |                                                                                                              |                                                                                                                                            |                                                                                     |

|           |                                                                                  | Name all entities with whom you have this relationship or indicate none (add rows as needed)                                                                                                                                                                                                                         | Specifications/Comments (e.g., if payments were made to you or to your institution) |  |  |  |  |  |  |
|-----------|----------------------------------------------------------------------------------|----------------------------------------------------------------------------------------------------------------------------------------------------------------------------------------------------------------------------------------------------------------------------------------------------------------------|-------------------------------------------------------------------------------------|--|--|--|--|--|--|
| <b>11</b> | Stock or stock options                                                           | <input checked="" type="checkbox"/> <b>None</b><br><table border="1" style="width: 100%; border-collapse: collapse;"> <tr><td style="width: 50%; height: 15px;"></td><td style="width: 50%;"></td></tr> <tr><td style="height: 15px;"></td><td></td></tr> <tr><td style="height: 15px;"></td><td></td></tr> </table> |                                                                                     |  |  |  |  |  |  |
|           |                                                                                  |                                                                                                                                                                                                                                                                                                                      |                                                                                     |  |  |  |  |  |  |
|           |                                                                                  |                                                                                                                                                                                                                                                                                                                      |                                                                                     |  |  |  |  |  |  |
|           |                                                                                  |                                                                                                                                                                                                                                                                                                                      |                                                                                     |  |  |  |  |  |  |
| <b>12</b> | Receipt of equipment, materials, drugs, medical writing, gifts or other services | <input checked="" type="checkbox"/> <b>None</b><br><table border="1" style="width: 100%; border-collapse: collapse;"> <tr><td style="width: 50%; height: 15px;"></td><td style="width: 50%;"></td></tr> <tr><td style="height: 15px;"></td><td></td></tr> <tr><td style="height: 15px;"></td><td></td></tr> </table> |                                                                                     |  |  |  |  |  |  |
|           |                                                                                  |                                                                                                                                                                                                                                                                                                                      |                                                                                     |  |  |  |  |  |  |
|           |                                                                                  |                                                                                                                                                                                                                                                                                                                      |                                                                                     |  |  |  |  |  |  |
|           |                                                                                  |                                                                                                                                                                                                                                                                                                                      |                                                                                     |  |  |  |  |  |  |
| <b>13</b> | Other financial or non-financial interests                                       | <input checked="" type="checkbox"/> <b>None</b><br><table border="1" style="width: 100%; border-collapse: collapse;"> <tr><td style="width: 50%; height: 15px;"></td><td style="width: 50%;"></td></tr> <tr><td style="height: 15px;"></td><td></td></tr> <tr><td style="height: 15px;"></td><td></td></tr> </table> |                                                                                     |  |  |  |  |  |  |
|           |                                                                                  |                                                                                                                                                                                                                                                                                                                      |                                                                                     |  |  |  |  |  |  |
|           |                                                                                  |                                                                                                                                                                                                                                                                                                                      |                                                                                     |  |  |  |  |  |  |
|           |                                                                                  |                                                                                                                                                                                                                                                                                                                      |                                                                                     |  |  |  |  |  |  |

**Please place an "X" next to the following statement to indicate your agreement:**

I certify that I have answered every question and have not altered the wording of any of the questions on this form.

## ICMJE DISCLOSURE FORM

**Date:** 11/2/2023

**Your Name:** Pierre Tariot

**Manuscript Title:** The Association Between Clinical Dementia Rating and Clinical Outcomes in Alzheimer's Disease

**Manuscript Number (if known):** DADM-D-23-00125

In the interest of transparency, we ask you to disclose all relationships/activities/interests listed below that are related to the content of your manuscript. "Related" means any relation with for-profit or not-for-profit third parties whose interests may be affected by the content of the manuscript. Disclosure represents a commitment to transparency and does not necessarily indicate a bias. If you are in doubt about whether to list a relationship/activity/interest, it is preferable that you do so.

The author's relationships/activities/interests should be defined broadly. For example, if your manuscript pertains to the epidemiology of hypertension, you should declare all relationships with manufacturers of antihypertensive medication, even if that medication is not mentioned in the manuscript.

In item #1 below, report all support for the work reported in this manuscript without time limit. For all other items, the time frame for disclosure is the past 36 months.

|                                                                                                  | Name all entities with whom you have this relationship or indicate none (add rows as needed)                                                                                   | Specifications/Comments (e.g., if payments were made to you or to your institution)                                                                                                                                                                                                                                                                                                                                |                                                                                                  |  |  |  |  |                                           |
|--------------------------------------------------------------------------------------------------|--------------------------------------------------------------------------------------------------------------------------------------------------------------------------------|--------------------------------------------------------------------------------------------------------------------------------------------------------------------------------------------------------------------------------------------------------------------------------------------------------------------------------------------------------------------------------------------------------------------|--------------------------------------------------------------------------------------------------|--|--|--|--|-------------------------------------------|
| Time frame: Since the initial planning of the work                                               |                                                                                                                                                                                |                                                                                                                                                                                                                                                                                                                                                                                                                    |                                                                                                  |  |  |  |  |                                           |
| <b>1</b>                                                                                         | All support for the present manuscript (e.g., funding, provision of study materials, medical writing, article processing charges, etc.)<br><b>No time limit for this item.</b> | <input checked="" type="checkbox"/> <b>None</b><br><table border="1" style="width: 100%; border-collapse: collapse; margin-top: 5px;"> <tr><td style="height: 20px;"> </td><td style="width: 20%;"></td></tr> <tr><td style="height: 20px;"> </td><td></td></tr> <tr><td style="height: 20px;"> </td><td style="text-align: right; font-size: small;">Click the tab key to add additional rows.</td></tr> </table> |                                                                                                  |  |  |  |  | Click the tab key to add additional rows. |
|                                                                                                  |                                                                                                                                                                                |                                                                                                                                                                                                                                                                                                                                                                                                                    |                                                                                                  |  |  |  |  |                                           |
|                                                                                                  |                                                                                                                                                                                |                                                                                                                                                                                                                                                                                                                                                                                                                    |                                                                                                  |  |  |  |  |                                           |
|                                                                                                  | Click the tab key to add additional rows.                                                                                                                                      |                                                                                                                                                                                                                                                                                                                                                                                                                    |                                                                                                  |  |  |  |  |                                           |
| Time frame: past 36 months                                                                       |                                                                                                                                                                                |                                                                                                                                                                                                                                                                                                                                                                                                                    |                                                                                                  |  |  |  |  |                                           |
| <b>2</b>                                                                                         | Grants or contracts from any entity (if not indicated in item #1 above).                                                                                                       | <input type="checkbox"/> <b>None</b><br><table border="1" style="width: 100%; border-collapse: collapse; margin-top: 5px;"> <tr><td style="height: 20px;">National Institute on Aging, RF1 AG041705, 1UF1AG046150, R01 AG031581, R01 AG055444, P30 AG19610</td><td style="width: 20%;"></td></tr> <tr><td style="height: 20px;"> </td><td></td></tr> <tr><td style="height: 20px;"> </td><td></td></tr> </table>   | National Institute on Aging, RF1 AG041705, 1UF1AG046150, R01 AG031581, R01 AG055444, P30 AG19610 |  |  |  |  |                                           |
| National Institute on Aging, RF1 AG041705, 1UF1AG046150, R01 AG031581, R01 AG055444, P30 AG19610 |                                                                                                                                                                                |                                                                                                                                                                                                                                                                                                                                                                                                                    |                                                                                                  |  |  |  |  |                                           |
|                                                                                                  |                                                                                                                                                                                |                                                                                                                                                                                                                                                                                                                                                                                                                    |                                                                                                  |  |  |  |  |                                           |
|                                                                                                  |                                                                                                                                                                                |                                                                                                                                                                                                                                                                                                                                                                                                                    |                                                                                                  |  |  |  |  |                                           |
| <b>3</b>                                                                                         | Royalties or licenses                                                                                                                                                          | <input checked="" type="checkbox"/> <b>None</b><br><table border="1" style="width: 100%; border-collapse: collapse; margin-top: 5px;"> <tr><td style="height: 20px;"> </td><td style="width: 20%;"></td></tr> <tr><td style="height: 20px;"> </td><td></td></tr> <tr><td style="height: 20px;"> </td><td></td></tr> </table>                                                                                       |                                                                                                  |  |  |  |  |                                           |
|                                                                                                  |                                                                                                                                                                                |                                                                                                                                                                                                                                                                                                                                                                                                                    |                                                                                                  |  |  |  |  |                                           |
|                                                                                                  |                                                                                                                                                                                |                                                                                                                                                                                                                                                                                                                                                                                                                    |                                                                                                  |  |  |  |  |                                           |
|                                                                                                  |                                                                                                                                                                                |                                                                                                                                                                                                                                                                                                                                                                                                                    |                                                                                                  |  |  |  |  |                                           |

|   |                                                                                                              | Name all entities with whom you have this relationship or indicate none (add rows as needed)                                                                                                                                                                                                                          | Specifications/Comments (e.g., if payments were made to you or to your institution) |
|---|--------------------------------------------------------------------------------------------------------------|-----------------------------------------------------------------------------------------------------------------------------------------------------------------------------------------------------------------------------------------------------------------------------------------------------------------------|-------------------------------------------------------------------------------------|
| 4 | Consulting fees                                                                                              | <input type="checkbox"/> None                                                                                                                                                                                                                                                                                         |                                                                                     |
|   |                                                                                                              | AbbVie, Acadia, ACimmune, Athira, Biogen, Cortexyme, Corium, Eisai, Lundbeck, Merck, Novo Nordisk, Otsuka & Astex, T3D Therapeutics                                                                                                                                                                                   | Personal                                                                            |
|   |                                                                                                              |                                                                                                                                                                                                                                                                                                                       |                                                                                     |
|   |                                                                                                              |                                                                                                                                                                                                                                                                                                                       |                                                                                     |
| 5 | Payment or honoraria for lectures, presentations, speakers bureaus, manuscript writing or educational events | <input type="checkbox"/> None                                                                                                                                                                                                                                                                                         |                                                                                     |
|   |                                                                                                              | Arizona Osteopathic Medical Association, Arbor Scientia, Clinical Care Operations, health & Wellness Partners, Indiana University, MedEdicus LLC, Merck, Miller Medical Communications, River West Meeting Associates, Sheppard Pratt Health Systems, Tucson Osteopathic Medical Foundation, University of Cincinnati |                                                                                     |
|   |                                                                                                              |                                                                                                                                                                                                                                                                                                                       |                                                                                     |
|   |                                                                                                              |                                                                                                                                                                                                                                                                                                                       |                                                                                     |
| 6 | Payment for expert testimony                                                                                 | <input checked="" type="checkbox"/> None                                                                                                                                                                                                                                                                              |                                                                                     |
|   |                                                                                                              |                                                                                                                                                                                                                                                                                                                       |                                                                                     |
|   |                                                                                                              |                                                                                                                                                                                                                                                                                                                       |                                                                                     |
|   |                                                                                                              |                                                                                                                                                                                                                                                                                                                       |                                                                                     |
| 7 | Support for attending meetings and/or travel                                                                 | <input type="checkbox"/> None                                                                                                                                                                                                                                                                                         |                                                                                     |
|   |                                                                                                              | Arbor Scientia, Acadia, Lundbeck, Miller Medical Communications                                                                                                                                                                                                                                                       |                                                                                     |
|   |                                                                                                              |                                                                                                                                                                                                                                                                                                                       |                                                                                     |
|   |                                                                                                              |                                                                                                                                                                                                                                                                                                                       |                                                                                     |
| 8 | Patents planned, issued or pending                                                                           | <input type="checkbox"/> None                                                                                                                                                                                                                                                                                         |                                                                                     |
|   |                                                                                                              | U.S. Patent #11/632, 747, "Biomarkers of Neurodegenerative Disease." Contributor to a patent owned by the University of Rochester                                                                                                                                                                                     |                                                                                     |
|   |                                                                                                              |                                                                                                                                                                                                                                                                                                                       |                                                                                     |
|   |                                                                                                              |                                                                                                                                                                                                                                                                                                                       |                                                                                     |
| 9 | Participation on a Data Safety Monitoring Board or Advisory Board                                            | <input type="checkbox"/> None                                                                                                                                                                                                                                                                                         |                                                                                     |
|   |                                                                                                              | AbbVie, AC Immune, Acadia, Athira, Corium, Cortexyme, Eisai, Genentech, ImmunoBrain, Merck, Novo Nordisk, Syneos Health                                                                                                                                                                                               |                                                                                     |
|   |                                                                                                              |                                                                                                                                                                                                                                                                                                                       |                                                                                     |
|   |                                                                                                              |                                                                                                                                                                                                                                                                                                                       |                                                                                     |

|           |                                                                                                   | Name all entities with whom you have this relationship or indicate none (add rows as needed) | Specifications/Comments (e.g., if payments were made to you or to your institution) |
|-----------|---------------------------------------------------------------------------------------------------|----------------------------------------------------------------------------------------------|-------------------------------------------------------------------------------------|
| <b>10</b> | Leadership or fiduciary role in other board, society, committee or advocacy group, paid or unpaid | <input checked="" type="checkbox"/> <b>None</b>                                              |                                                                                     |
|           |                                                                                                   |                                                                                              |                                                                                     |
|           |                                                                                                   |                                                                                              |                                                                                     |
| <b>11</b> | Stock or stock options                                                                            | <input type="checkbox"/> <b>None</b>                                                         |                                                                                     |
|           |                                                                                                   | Adamas Pharmaceuticals, sold in December 2020                                                |                                                                                     |
|           |                                                                                                   |                                                                                              |                                                                                     |
|           |                                                                                                   |                                                                                              |                                                                                     |
| <b>12</b> | Receipt of equipment, materials, drugs, medical writing, gifts or other services                  | <input checked="" type="checkbox"/> <b>None</b>                                              |                                                                                     |
|           |                                                                                                   |                                                                                              |                                                                                     |
|           |                                                                                                   |                                                                                              |                                                                                     |
| <b>13</b> | Other financial or non-financial interests                                                        | <input checked="" type="checkbox"/> <b>None</b>                                              |                                                                                     |
|           |                                                                                                   |                                                                                              |                                                                                     |
|           |                                                                                                   |                                                                                              |                                                                                     |

Please place an "X" next to the following statement to indicate your agreement:

I certify that I have answered every question and have not altered the wording of any of the questions on this form.

## ICMJE DISCLOSURE FORM

**Date:** 11/7/2023

**Your Name:** Firas Dabbous

**Manuscript Title:** The Association Between Clinical Dementia Rating and Clinical Outcomes in Alzheimer's Disease

**Manuscript Number (if known):** DADM-D-23-00125

In the interest of transparency, we ask you to disclose all relationships/activities/interests listed below that are related to the content of your manuscript. "Related" means any relation with for-profit or not-for-profit third parties whose interests may be affected by the content of the manuscript. Disclosure represents a commitment to transparency and does not necessarily indicate a bias. If you are in doubt about whether to list a relationship/activity/interest, it is preferable that you do so.

The author's relationships/activities/interests should be defined broadly. For example, if your manuscript pertains to the epidemiology of hypertension, you should declare all relationships with manufacturers of antihypertensive medication, even if that medication is not mentioned in the manuscript.

In item #1 below, report all support for the work reported in this manuscript without time limit. For all other items, the time frame for disclosure is the past 36 months.

|                                                    | Name all entities with whom you have this relationship or indicate none (add rows as needed)                                                                                   | Specifications/Comments (e.g., if payments were made to you or to your institution)                                                                                                                                                                                                                                                                       |  |  |  |  |  |  |
|----------------------------------------------------|--------------------------------------------------------------------------------------------------------------------------------------------------------------------------------|-----------------------------------------------------------------------------------------------------------------------------------------------------------------------------------------------------------------------------------------------------------------------------------------------------------------------------------------------------------|--|--|--|--|--|--|
| Time frame: Since the initial planning of the work |                                                                                                                                                                                |                                                                                                                                                                                                                                                                                                                                                           |  |  |  |  |  |  |
| <b>1</b>                                           | All support for the present manuscript (e.g., funding, provision of study materials, medical writing, article processing charges, etc.)<br><b>No time limit for this item.</b> | <input checked="" type="checkbox"/> <b>None</b><br><table border="1" style="width: 100%; height: 40px; margin-top: 5px;"> <tr><td style="width: 60%;"></td><td></td></tr> <tr><td></td><td></td></tr> <tr><td></td><td></td></tr> </table> <p style="font-size: small; text-align: right; margin-top: 5px;">Click the tab key to add additional rows.</p> |  |  |  |  |  |  |
|                                                    |                                                                                                                                                                                |                                                                                                                                                                                                                                                                                                                                                           |  |  |  |  |  |  |
|                                                    |                                                                                                                                                                                |                                                                                                                                                                                                                                                                                                                                                           |  |  |  |  |  |  |
|                                                    |                                                                                                                                                                                |                                                                                                                                                                                                                                                                                                                                                           |  |  |  |  |  |  |
| Time frame: past 36 months                         |                                                                                                                                                                                |                                                                                                                                                                                                                                                                                                                                                           |  |  |  |  |  |  |
| <b>2</b>                                           | Grants or contracts from any entity (if not indicated in item #1 above).                                                                                                       | <input checked="" type="checkbox"/> <b>None</b><br><table border="1" style="width: 100%; height: 40px; margin-top: 5px;"> <tr><td style="width: 60%;"></td><td></td></tr> <tr><td></td><td></td></tr> <tr><td></td><td></td></tr> </table>                                                                                                                |  |  |  |  |  |  |
|                                                    |                                                                                                                                                                                |                                                                                                                                                                                                                                                                                                                                                           |  |  |  |  |  |  |
|                                                    |                                                                                                                                                                                |                                                                                                                                                                                                                                                                                                                                                           |  |  |  |  |  |  |
|                                                    |                                                                                                                                                                                |                                                                                                                                                                                                                                                                                                                                                           |  |  |  |  |  |  |
| <b>3</b>                                           | Royalties or licenses                                                                                                                                                          | <input checked="" type="checkbox"/> <b>None</b><br><table border="1" style="width: 100%; height: 40px; margin-top: 5px;"> <tr><td style="width: 60%;"></td><td></td></tr> <tr><td></td><td></td></tr> <tr><td></td><td></td></tr> </table>                                                                                                                |  |  |  |  |  |  |
|                                                    |                                                                                                                                                                                |                                                                                                                                                                                                                                                                                                                                                           |  |  |  |  |  |  |
|                                                    |                                                                                                                                                                                |                                                                                                                                                                                                                                                                                                                                                           |  |  |  |  |  |  |
|                                                    |                                                                                                                                                                                |                                                                                                                                                                                                                                                                                                                                                           |  |  |  |  |  |  |

|    |                                                                                                              | Name all entities with whom you have this relationship or indicate none (add rows as needed)                                                                                                                                                                                                                                                                           | Specifications/Comments (e.g., if payments were made to you or to your institution) |  |  |  |  |  |  |  |  |
|----|--------------------------------------------------------------------------------------------------------------|------------------------------------------------------------------------------------------------------------------------------------------------------------------------------------------------------------------------------------------------------------------------------------------------------------------------------------------------------------------------|-------------------------------------------------------------------------------------|--|--|--|--|--|--|--|--|
| 4  | Consulting fees                                                                                              | <input checked="" type="checkbox"/> <b>None</b><br><table border="1" style="width: 100%; border-collapse: collapse;"> <tr><td style="width: 50%; height: 15px;"></td><td style="width: 50%;"></td></tr> <tr><td style="height: 15px;"></td><td></td></tr> <tr><td style="height: 15px;"></td><td></td></tr> <tr><td style="height: 15px;"></td><td></td></tr> </table> |                                                                                     |  |  |  |  |  |  |  |  |
|    |                                                                                                              |                                                                                                                                                                                                                                                                                                                                                                        |                                                                                     |  |  |  |  |  |  |  |  |
|    |                                                                                                              |                                                                                                                                                                                                                                                                                                                                                                        |                                                                                     |  |  |  |  |  |  |  |  |
|    |                                                                                                              |                                                                                                                                                                                                                                                                                                                                                                        |                                                                                     |  |  |  |  |  |  |  |  |
|    |                                                                                                              |                                                                                                                                                                                                                                                                                                                                                                        |                                                                                     |  |  |  |  |  |  |  |  |
| 5  | Payment or honoraria for lectures, presentations, speakers bureaus, manuscript writing or educational events | <input checked="" type="checkbox"/> <b>None</b><br><table border="1" style="width: 100%; border-collapse: collapse;"> <tr><td style="width: 50%; height: 15px;"></td><td style="width: 50%;"></td></tr> <tr><td style="height: 15px;"></td><td></td></tr> <tr><td style="height: 15px;"></td><td></td></tr> </table>                                                   |                                                                                     |  |  |  |  |  |  |  |  |
|    |                                                                                                              |                                                                                                                                                                                                                                                                                                                                                                        |                                                                                     |  |  |  |  |  |  |  |  |
|    |                                                                                                              |                                                                                                                                                                                                                                                                                                                                                                        |                                                                                     |  |  |  |  |  |  |  |  |
|    |                                                                                                              |                                                                                                                                                                                                                                                                                                                                                                        |                                                                                     |  |  |  |  |  |  |  |  |
| 6  | Payment for expert testimony                                                                                 | <input checked="" type="checkbox"/> <b>None</b><br><table border="1" style="width: 100%; border-collapse: collapse;"> <tr><td style="width: 50%; height: 15px;"></td><td style="width: 50%;"></td></tr> <tr><td style="height: 15px;"></td><td></td></tr> <tr><td style="height: 15px;"></td><td></td></tr> </table>                                                   |                                                                                     |  |  |  |  |  |  |  |  |
|    |                                                                                                              |                                                                                                                                                                                                                                                                                                                                                                        |                                                                                     |  |  |  |  |  |  |  |  |
|    |                                                                                                              |                                                                                                                                                                                                                                                                                                                                                                        |                                                                                     |  |  |  |  |  |  |  |  |
|    |                                                                                                              |                                                                                                                                                                                                                                                                                                                                                                        |                                                                                     |  |  |  |  |  |  |  |  |
| 7  | Support for attending meetings and/or travel                                                                 | <input checked="" type="checkbox"/> <b>None</b><br><table border="1" style="width: 100%; border-collapse: collapse;"> <tr><td style="width: 50%; height: 15px;"></td><td style="width: 50%;"></td></tr> <tr><td style="height: 15px;"></td><td></td></tr> <tr><td style="height: 15px;"></td><td></td></tr> </table>                                                   |                                                                                     |  |  |  |  |  |  |  |  |
|    |                                                                                                              |                                                                                                                                                                                                                                                                                                                                                                        |                                                                                     |  |  |  |  |  |  |  |  |
|    |                                                                                                              |                                                                                                                                                                                                                                                                                                                                                                        |                                                                                     |  |  |  |  |  |  |  |  |
|    |                                                                                                              |                                                                                                                                                                                                                                                                                                                                                                        |                                                                                     |  |  |  |  |  |  |  |  |
| 8  | Patents planned, issued or pending                                                                           | <input checked="" type="checkbox"/> <b>None</b><br><table border="1" style="width: 100%; border-collapse: collapse;"> <tr><td style="width: 50%; height: 15px;"></td><td style="width: 50%;"></td></tr> <tr><td style="height: 15px;"></td><td></td></tr> <tr><td style="height: 15px;"></td><td></td></tr> </table>                                                   |                                                                                     |  |  |  |  |  |  |  |  |
|    |                                                                                                              |                                                                                                                                                                                                                                                                                                                                                                        |                                                                                     |  |  |  |  |  |  |  |  |
|    |                                                                                                              |                                                                                                                                                                                                                                                                                                                                                                        |                                                                                     |  |  |  |  |  |  |  |  |
|    |                                                                                                              |                                                                                                                                                                                                                                                                                                                                                                        |                                                                                     |  |  |  |  |  |  |  |  |
| 9  | Participation on a Data Safety Monitoring Board or Advisory Board                                            | <input checked="" type="checkbox"/> <b>None</b><br><table border="1" style="width: 100%; border-collapse: collapse;"> <tr><td style="width: 50%; height: 15px;"></td><td style="width: 50%;"></td></tr> <tr><td style="height: 15px;"></td><td></td></tr> <tr><td style="height: 15px;"></td><td></td></tr> </table>                                                   |                                                                                     |  |  |  |  |  |  |  |  |
|    |                                                                                                              |                                                                                                                                                                                                                                                                                                                                                                        |                                                                                     |  |  |  |  |  |  |  |  |
|    |                                                                                                              |                                                                                                                                                                                                                                                                                                                                                                        |                                                                                     |  |  |  |  |  |  |  |  |
|    |                                                                                                              |                                                                                                                                                                                                                                                                                                                                                                        |                                                                                     |  |  |  |  |  |  |  |  |
| 10 | Leadership or fiduciary role in other board, society, committee or advocacy group, paid or unpaid            | <input checked="" type="checkbox"/> <b>None</b><br><table border="1" style="width: 100%; border-collapse: collapse;"> <tr><td style="width: 50%; height: 15px;"></td><td style="width: 50%;"></td></tr> <tr><td style="height: 15px;"></td><td></td></tr> <tr><td style="height: 15px;"></td><td></td></tr> </table>                                                   |                                                                                     |  |  |  |  |  |  |  |  |
|    |                                                                                                              |                                                                                                                                                                                                                                                                                                                                                                        |                                                                                     |  |  |  |  |  |  |  |  |
|    |                                                                                                              |                                                                                                                                                                                                                                                                                                                                                                        |                                                                                     |  |  |  |  |  |  |  |  |
|    |                                                                                                              |                                                                                                                                                                                                                                                                                                                                                                        |                                                                                     |  |  |  |  |  |  |  |  |

|           |                                                                                  | Name all entities with whom you have this relationship or indicate none (add rows as needed) | Specifications/Comments (e.g., if payments were made to you or to your institution) |
|-----------|----------------------------------------------------------------------------------|----------------------------------------------------------------------------------------------|-------------------------------------------------------------------------------------|
| <b>11</b> | Stock or stock options                                                           | <input checked="" type="checkbox"/> <b>None</b>                                              |                                                                                     |
|           |                                                                                  |                                                                                              |                                                                                     |
|           |                                                                                  |                                                                                              |                                                                                     |
| <b>12</b> | Receipt of equipment, materials, drugs, medical writing, gifts or other services | <input checked="" type="checkbox"/> <b>None</b>                                              |                                                                                     |
|           |                                                                                  |                                                                                              |                                                                                     |
|           |                                                                                  |                                                                                              |                                                                                     |
| <b>13</b> | Other financial or non-financial interests                                       | <input type="checkbox"/> <b>None</b>                                                         |                                                                                     |
|           |                                                                                  | Evidera, PPD, part of Thermo Fisher                                                          | Full time employee                                                                  |
|           |                                                                                  |                                                                                              |                                                                                     |
|           |                                                                                  |                                                                                              |                                                                                     |

**Please place an "X" next to the following statement to indicate your agreement:**

I certify that I have answered every question and have not altered the wording of any of the questions on this form.

## ICMJE DISCLOSURE FORM

**Date:** 11/1/2023

**Your Name:** Julie Hahn-Pedersen

**Manuscript Title:** The Association Between Clinical Dementia Rating and Clinical Outcomes in Alzheimer's Disease

**Manuscript Number (if known):** DADM-D-23-00125

In the interest of transparency, we ask you to disclose all relationships/activities/interests listed below that are related to the content of your manuscript. "Related" means any relation with for-profit or not-for-profit third parties whose interests may be affected by the content of the manuscript. Disclosure represents a commitment to transparency and does not necessarily indicate a bias. If you are in doubt about whether to list a relationship/activity/interest, it is preferable that you do so.

The author's relationships/activities/interests should be defined broadly. For example, if your manuscript pertains to the epidemiology of hypertension, you should declare all relationships with manufacturers of antihypertensive medication, even if that medication is not mentioned in the manuscript.

In item #1 below, report all support for the work reported in this manuscript without time limit. For all other items, the time frame for disclosure is the past 36 months.

|                                                    | Name all entities with whom you have this relationship or indicate none (add rows as needed)                                                                                   | Specifications/Comments (e.g., if payments were made to you or to your institution)                                                                                                                                                                                                                                                                                                                |  |  |  |  |  |  |
|----------------------------------------------------|--------------------------------------------------------------------------------------------------------------------------------------------------------------------------------|----------------------------------------------------------------------------------------------------------------------------------------------------------------------------------------------------------------------------------------------------------------------------------------------------------------------------------------------------------------------------------------------------|--|--|--|--|--|--|
| Time frame: Since the initial planning of the work |                                                                                                                                                                                |                                                                                                                                                                                                                                                                                                                                                                                                    |  |  |  |  |  |  |
| <b>1</b>                                           | All support for the present manuscript (e.g., funding, provision of study materials, medical writing, article processing charges, etc.)<br><b>No time limit for this item.</b> | <input checked="" type="checkbox"/> <b>Novo Nordisk A/S funded the study and manuscript.</b><br><table border="1" style="width: 100%; height: 40px; margin-top: 5px;"> <tr><td style="width: 60%;"></td><td></td></tr> <tr><td></td><td></td></tr> <tr><td></td><td></td></tr> </table> <p style="font-size: small; color: gray; text-align: right;">Click the tab key to add additional rows.</p> |  |  |  |  |  |  |
|                                                    |                                                                                                                                                                                |                                                                                                                                                                                                                                                                                                                                                                                                    |  |  |  |  |  |  |
|                                                    |                                                                                                                                                                                |                                                                                                                                                                                                                                                                                                                                                                                                    |  |  |  |  |  |  |
|                                                    |                                                                                                                                                                                |                                                                                                                                                                                                                                                                                                                                                                                                    |  |  |  |  |  |  |
| Time frame: past 36 months                         |                                                                                                                                                                                |                                                                                                                                                                                                                                                                                                                                                                                                    |  |  |  |  |  |  |
| <b>2</b>                                           | Grants or contracts from any entity (if not indicated in item #1 above).                                                                                                       | <input checked="" type="checkbox"/> <b>None</b><br><table border="1" style="width: 100%; height: 40px; margin-top: 5px;"> <tr><td style="width: 60%;"></td><td></td></tr> <tr><td></td><td></td></tr> <tr><td></td><td></td></tr> </table>                                                                                                                                                         |  |  |  |  |  |  |
|                                                    |                                                                                                                                                                                |                                                                                                                                                                                                                                                                                                                                                                                                    |  |  |  |  |  |  |
|                                                    |                                                                                                                                                                                |                                                                                                                                                                                                                                                                                                                                                                                                    |  |  |  |  |  |  |
|                                                    |                                                                                                                                                                                |                                                                                                                                                                                                                                                                                                                                                                                                    |  |  |  |  |  |  |
| <b>3</b>                                           | Royalties or licenses                                                                                                                                                          | <input checked="" type="checkbox"/> <b>None</b><br><table border="1" style="width: 100%; height: 40px; margin-top: 5px;"> <tr><td style="width: 60%;"></td><td></td></tr> <tr><td></td><td></td></tr> <tr><td></td><td></td></tr> </table>                                                                                                                                                         |  |  |  |  |  |  |
|                                                    |                                                                                                                                                                                |                                                                                                                                                                                                                                                                                                                                                                                                    |  |  |  |  |  |  |
|                                                    |                                                                                                                                                                                |                                                                                                                                                                                                                                                                                                                                                                                                    |  |  |  |  |  |  |
|                                                    |                                                                                                                                                                                |                                                                                                                                                                                                                                                                                                                                                                                                    |  |  |  |  |  |  |

|    |                                                                                                              | Name all entities with whom you have this relationship or indicate none (add rows as needed)                                                                                                                                                                                                                                                                           | Specifications/Comments (e.g., if payments were made to you or to your institution) |  |  |  |  |  |  |  |  |
|----|--------------------------------------------------------------------------------------------------------------|------------------------------------------------------------------------------------------------------------------------------------------------------------------------------------------------------------------------------------------------------------------------------------------------------------------------------------------------------------------------|-------------------------------------------------------------------------------------|--|--|--|--|--|--|--|--|
| 4  | Consulting fees                                                                                              | <input checked="" type="checkbox"/> <b>None</b><br><table border="1" style="width: 100%; border-collapse: collapse;"> <tr><td style="width: 50%; height: 15px;"></td><td style="width: 50%;"></td></tr> <tr><td style="height: 15px;"></td><td></td></tr> <tr><td style="height: 15px;"></td><td></td></tr> <tr><td style="height: 15px;"></td><td></td></tr> </table> |                                                                                     |  |  |  |  |  |  |  |  |
|    |                                                                                                              |                                                                                                                                                                                                                                                                                                                                                                        |                                                                                     |  |  |  |  |  |  |  |  |
|    |                                                                                                              |                                                                                                                                                                                                                                                                                                                                                                        |                                                                                     |  |  |  |  |  |  |  |  |
|    |                                                                                                              |                                                                                                                                                                                                                                                                                                                                                                        |                                                                                     |  |  |  |  |  |  |  |  |
|    |                                                                                                              |                                                                                                                                                                                                                                                                                                                                                                        |                                                                                     |  |  |  |  |  |  |  |  |
| 5  | Payment or honoraria for lectures, presentations, speakers bureaus, manuscript writing or educational events | <input checked="" type="checkbox"/> <b>None</b><br><table border="1" style="width: 100%; border-collapse: collapse;"> <tr><td style="width: 50%; height: 15px;"></td><td style="width: 50%;"></td></tr> <tr><td style="height: 15px;"></td><td></td></tr> <tr><td style="height: 15px;"></td><td></td></tr> </table>                                                   |                                                                                     |  |  |  |  |  |  |  |  |
|    |                                                                                                              |                                                                                                                                                                                                                                                                                                                                                                        |                                                                                     |  |  |  |  |  |  |  |  |
|    |                                                                                                              |                                                                                                                                                                                                                                                                                                                                                                        |                                                                                     |  |  |  |  |  |  |  |  |
|    |                                                                                                              |                                                                                                                                                                                                                                                                                                                                                                        |                                                                                     |  |  |  |  |  |  |  |  |
| 6  | Payment for expert testimony                                                                                 | <input checked="" type="checkbox"/> <b>None</b><br><table border="1" style="width: 100%; border-collapse: collapse;"> <tr><td style="width: 50%; height: 15px;"></td><td style="width: 50%;"></td></tr> <tr><td style="height: 15px;"></td><td></td></tr> <tr><td style="height: 15px;"></td><td></td></tr> </table>                                                   |                                                                                     |  |  |  |  |  |  |  |  |
|    |                                                                                                              |                                                                                                                                                                                                                                                                                                                                                                        |                                                                                     |  |  |  |  |  |  |  |  |
|    |                                                                                                              |                                                                                                                                                                                                                                                                                                                                                                        |                                                                                     |  |  |  |  |  |  |  |  |
|    |                                                                                                              |                                                                                                                                                                                                                                                                                                                                                                        |                                                                                     |  |  |  |  |  |  |  |  |
| 7  | Support for attending meetings and/or travel                                                                 | <input checked="" type="checkbox"/> <b>None</b><br><table border="1" style="width: 100%; border-collapse: collapse;"> <tr><td style="width: 50%; height: 15px;"></td><td style="width: 50%;"></td></tr> <tr><td style="height: 15px;"></td><td></td></tr> <tr><td style="height: 15px;"></td><td></td></tr> </table>                                                   |                                                                                     |  |  |  |  |  |  |  |  |
|    |                                                                                                              |                                                                                                                                                                                                                                                                                                                                                                        |                                                                                     |  |  |  |  |  |  |  |  |
|    |                                                                                                              |                                                                                                                                                                                                                                                                                                                                                                        |                                                                                     |  |  |  |  |  |  |  |  |
|    |                                                                                                              |                                                                                                                                                                                                                                                                                                                                                                        |                                                                                     |  |  |  |  |  |  |  |  |
| 8  | Patents planned, issued or pending                                                                           | <input checked="" type="checkbox"/> <b>None</b><br><table border="1" style="width: 100%; border-collapse: collapse;"> <tr><td style="width: 50%; height: 15px;"></td><td style="width: 50%;"></td></tr> <tr><td style="height: 15px;"></td><td></td></tr> <tr><td style="height: 15px;"></td><td></td></tr> </table>                                                   |                                                                                     |  |  |  |  |  |  |  |  |
|    |                                                                                                              |                                                                                                                                                                                                                                                                                                                                                                        |                                                                                     |  |  |  |  |  |  |  |  |
|    |                                                                                                              |                                                                                                                                                                                                                                                                                                                                                                        |                                                                                     |  |  |  |  |  |  |  |  |
|    |                                                                                                              |                                                                                                                                                                                                                                                                                                                                                                        |                                                                                     |  |  |  |  |  |  |  |  |
| 9  | Participation on a Data Safety Monitoring Board or Advisory Board                                            | <input checked="" type="checkbox"/> <b>None</b><br><table border="1" style="width: 100%; border-collapse: collapse;"> <tr><td style="width: 50%; height: 15px;"></td><td style="width: 50%;"></td></tr> <tr><td style="height: 15px;"></td><td></td></tr> <tr><td style="height: 15px;"></td><td></td></tr> </table>                                                   |                                                                                     |  |  |  |  |  |  |  |  |
|    |                                                                                                              |                                                                                                                                                                                                                                                                                                                                                                        |                                                                                     |  |  |  |  |  |  |  |  |
|    |                                                                                                              |                                                                                                                                                                                                                                                                                                                                                                        |                                                                                     |  |  |  |  |  |  |  |  |
|    |                                                                                                              |                                                                                                                                                                                                                                                                                                                                                                        |                                                                                     |  |  |  |  |  |  |  |  |
| 10 | Leadership or fiduciary role in other board, society, committee or advocacy group, paid or unpaid            | <input checked="" type="checkbox"/> <b>None</b><br><table border="1" style="width: 100%; border-collapse: collapse;"> <tr><td style="width: 50%; height: 15px;"></td><td style="width: 50%;"></td></tr> <tr><td style="height: 15px;"></td><td></td></tr> <tr><td style="height: 15px;"></td><td></td></tr> </table>                                                   |                                                                                     |  |  |  |  |  |  |  |  |
|    |                                                                                                              |                                                                                                                                                                                                                                                                                                                                                                        |                                                                                     |  |  |  |  |  |  |  |  |
|    |                                                                                                              |                                                                                                                                                                                                                                                                                                                                                                        |                                                                                     |  |  |  |  |  |  |  |  |
|    |                                                                                                              |                                                                                                                                                                                                                                                                                                                                                                        |                                                                                     |  |  |  |  |  |  |  |  |

|           |                                                                                  | Name all entities with whom you have this relationship or indicate none (add rows as needed)                                                                                                                                                                                                                                                  | Specifications/Comments (e.g., if payments were made to you or to your institution) |  |  |  |  |  |  |
|-----------|----------------------------------------------------------------------------------|-----------------------------------------------------------------------------------------------------------------------------------------------------------------------------------------------------------------------------------------------------------------------------------------------------------------------------------------------|-------------------------------------------------------------------------------------|--|--|--|--|--|--|
| <b>11</b> | Stock or stock options                                                           | <input checked="" type="checkbox"/> I am a shareholder of Novo Nordisk<br><table border="1" style="width: 100%; border-collapse: collapse;"> <tr><td style="width: 50%; height: 15px;"></td><td style="width: 50%;"></td></tr> <tr><td style="height: 15px;"></td><td></td></tr> <tr><td style="height: 15px;"></td><td></td></tr> </table>   |                                                                                     |  |  |  |  |  |  |
|           |                                                                                  |                                                                                                                                                                                                                                                                                                                                               |                                                                                     |  |  |  |  |  |  |
|           |                                                                                  |                                                                                                                                                                                                                                                                                                                                               |                                                                                     |  |  |  |  |  |  |
|           |                                                                                  |                                                                                                                                                                                                                                                                                                                                               |                                                                                     |  |  |  |  |  |  |
| <b>12</b> | Receipt of equipment, materials, drugs, medical writing, gifts or other services | <input checked="" type="checkbox"/> None<br><table border="1" style="width: 100%; border-collapse: collapse;"> <tr><td style="width: 50%; height: 15px;"></td><td style="width: 50%;"></td></tr> <tr><td style="height: 15px;"></td><td></td></tr> <tr><td style="height: 15px;"></td><td></td></tr> </table>                                 |                                                                                     |  |  |  |  |  |  |
|           |                                                                                  |                                                                                                                                                                                                                                                                                                                                               |                                                                                     |  |  |  |  |  |  |
|           |                                                                                  |                                                                                                                                                                                                                                                                                                                                               |                                                                                     |  |  |  |  |  |  |
|           |                                                                                  |                                                                                                                                                                                                                                                                                                                                               |                                                                                     |  |  |  |  |  |  |
| <b>13</b> | Other financial or non-financial interests                                       | <input checked="" type="checkbox"/> I am an employee of Novo Nordisk A/S<br><table border="1" style="width: 100%; border-collapse: collapse;"> <tr><td style="width: 50%; height: 15px;"></td><td style="width: 50%;"></td></tr> <tr><td style="height: 15px;"></td><td></td></tr> <tr><td style="height: 15px;"></td><td></td></tr> </table> |                                                                                     |  |  |  |  |  |  |
|           |                                                                                  |                                                                                                                                                                                                                                                                                                                                               |                                                                                     |  |  |  |  |  |  |
|           |                                                                                  |                                                                                                                                                                                                                                                                                                                                               |                                                                                     |  |  |  |  |  |  |
|           |                                                                                  |                                                                                                                                                                                                                                                                                                                                               |                                                                                     |  |  |  |  |  |  |

**Please place an "X" next to the following statement to indicate your agreement:**

I certify that I have answered every question and have not altered the wording of any of the questions on this form.

## ICMJE DISCLOSURE FORM

**Date:** 11/7/2023

**Your Name:** Sariya Udayachalerm

**Manuscript Title:** The Association Between Clinical Dementia Rating and Clinical Outcomes in Alzheimer's Disease

**Manuscript Number (if known):** DADM-D-23-00125

In the interest of transparency, we ask you to disclose all relationships/activities/interests listed below that are related to the content of your manuscript. "Related" means any relation with for-profit or not-for-profit third parties whose interests may be affected by the content of the manuscript. Disclosure represents a commitment to transparency and does not necessarily indicate a bias. If you are in doubt about whether to list a relationship/activity/interest, it is preferable that you do so.

The author's relationships/activities/interests should be defined broadly. For example, if your manuscript pertains to the epidemiology of hypertension, you should declare all relationships with manufacturers of antihypertensive medication, even if that medication is not mentioned in the manuscript.

In item #1 below, report all support for the work reported in this manuscript without time limit. For all other items, the time frame for disclosure is the past 36 months.

|                                                    | Name all entities with whom you have this relationship or indicate none (add rows as needed)                                                                                   | Specifications/Comments (e.g., if payments were made to you or to your institution)                                                                                                                                                                                                                                                                       |  |  |  |  |  |  |
|----------------------------------------------------|--------------------------------------------------------------------------------------------------------------------------------------------------------------------------------|-----------------------------------------------------------------------------------------------------------------------------------------------------------------------------------------------------------------------------------------------------------------------------------------------------------------------------------------------------------|--|--|--|--|--|--|
| Time frame: Since the initial planning of the work |                                                                                                                                                                                |                                                                                                                                                                                                                                                                                                                                                           |  |  |  |  |  |  |
| <b>1</b>                                           | All support for the present manuscript (e.g., funding, provision of study materials, medical writing, article processing charges, etc.)<br><b>No time limit for this item.</b> | <input checked="" type="checkbox"/> <b>None</b><br><table border="1" style="width: 100%; height: 40px; margin-top: 5px;"> <tr><td style="width: 60%;"></td><td></td></tr> <tr><td></td><td></td></tr> <tr><td></td><td></td></tr> </table> <p style="font-size: small; text-align: right; margin-top: 5px;">Click the tab key to add additional rows.</p> |  |  |  |  |  |  |
|                                                    |                                                                                                                                                                                |                                                                                                                                                                                                                                                                                                                                                           |  |  |  |  |  |  |
|                                                    |                                                                                                                                                                                |                                                                                                                                                                                                                                                                                                                                                           |  |  |  |  |  |  |
|                                                    |                                                                                                                                                                                |                                                                                                                                                                                                                                                                                                                                                           |  |  |  |  |  |  |
| Time frame: past 36 months                         |                                                                                                                                                                                |                                                                                                                                                                                                                                                                                                                                                           |  |  |  |  |  |  |
| <b>2</b>                                           | Grants or contracts from any entity (if not indicated in item #1 above).                                                                                                       | <input checked="" type="checkbox"/> <b>None</b><br><table border="1" style="width: 100%; height: 40px; margin-top: 5px;"> <tr><td style="width: 60%;"></td><td></td></tr> <tr><td></td><td></td></tr> <tr><td></td><td></td></tr> </table>                                                                                                                |  |  |  |  |  |  |
|                                                    |                                                                                                                                                                                |                                                                                                                                                                                                                                                                                                                                                           |  |  |  |  |  |  |
|                                                    |                                                                                                                                                                                |                                                                                                                                                                                                                                                                                                                                                           |  |  |  |  |  |  |
|                                                    |                                                                                                                                                                                |                                                                                                                                                                                                                                                                                                                                                           |  |  |  |  |  |  |
| <b>3</b>                                           | Royalties or licenses                                                                                                                                                          | <input checked="" type="checkbox"/> <b>None</b><br><table border="1" style="width: 100%; height: 40px; margin-top: 5px;"> <tr><td style="width: 60%;"></td><td></td></tr> <tr><td></td><td></td></tr> <tr><td></td><td></td></tr> </table>                                                                                                                |  |  |  |  |  |  |
|                                                    |                                                                                                                                                                                |                                                                                                                                                                                                                                                                                                                                                           |  |  |  |  |  |  |
|                                                    |                                                                                                                                                                                |                                                                                                                                                                                                                                                                                                                                                           |  |  |  |  |  |  |
|                                                    |                                                                                                                                                                                |                                                                                                                                                                                                                                                                                                                                                           |  |  |  |  |  |  |

|    |                                                                                                              | Name all entities with whom you have this relationship or indicate none (add rows as needed)                                                                                                                                                                                                                                                                           | Specifications/Comments (e.g., if payments were made to you or to your institution) |  |  |  |  |  |  |  |  |
|----|--------------------------------------------------------------------------------------------------------------|------------------------------------------------------------------------------------------------------------------------------------------------------------------------------------------------------------------------------------------------------------------------------------------------------------------------------------------------------------------------|-------------------------------------------------------------------------------------|--|--|--|--|--|--|--|--|
| 4  | Consulting fees                                                                                              | <input checked="" type="checkbox"/> <b>None</b><br><table border="1" style="width: 100%; border-collapse: collapse;"> <tr><td style="width: 50%; height: 15px;"></td><td style="width: 50%;"></td></tr> <tr><td style="height: 15px;"></td><td></td></tr> <tr><td style="height: 15px;"></td><td></td></tr> <tr><td style="height: 15px;"></td><td></td></tr> </table> |                                                                                     |  |  |  |  |  |  |  |  |
|    |                                                                                                              |                                                                                                                                                                                                                                                                                                                                                                        |                                                                                     |  |  |  |  |  |  |  |  |
|    |                                                                                                              |                                                                                                                                                                                                                                                                                                                                                                        |                                                                                     |  |  |  |  |  |  |  |  |
|    |                                                                                                              |                                                                                                                                                                                                                                                                                                                                                                        |                                                                                     |  |  |  |  |  |  |  |  |
|    |                                                                                                              |                                                                                                                                                                                                                                                                                                                                                                        |                                                                                     |  |  |  |  |  |  |  |  |
| 5  | Payment or honoraria for lectures, presentations, speakers bureaus, manuscript writing or educational events | <input checked="" type="checkbox"/> <b>None</b><br><table border="1" style="width: 100%; border-collapse: collapse;"> <tr><td style="width: 50%; height: 15px;"></td><td style="width: 50%;"></td></tr> <tr><td style="height: 15px;"></td><td></td></tr> <tr><td style="height: 15px;"></td><td></td></tr> </table>                                                   |                                                                                     |  |  |  |  |  |  |  |  |
|    |                                                                                                              |                                                                                                                                                                                                                                                                                                                                                                        |                                                                                     |  |  |  |  |  |  |  |  |
|    |                                                                                                              |                                                                                                                                                                                                                                                                                                                                                                        |                                                                                     |  |  |  |  |  |  |  |  |
|    |                                                                                                              |                                                                                                                                                                                                                                                                                                                                                                        |                                                                                     |  |  |  |  |  |  |  |  |
| 6  | Payment for expert testimony                                                                                 | <input checked="" type="checkbox"/> <b>None</b><br><table border="1" style="width: 100%; border-collapse: collapse;"> <tr><td style="width: 50%; height: 15px;"></td><td style="width: 50%;"></td></tr> <tr><td style="height: 15px;"></td><td></td></tr> <tr><td style="height: 15px;"></td><td></td></tr> </table>                                                   |                                                                                     |  |  |  |  |  |  |  |  |
|    |                                                                                                              |                                                                                                                                                                                                                                                                                                                                                                        |                                                                                     |  |  |  |  |  |  |  |  |
|    |                                                                                                              |                                                                                                                                                                                                                                                                                                                                                                        |                                                                                     |  |  |  |  |  |  |  |  |
|    |                                                                                                              |                                                                                                                                                                                                                                                                                                                                                                        |                                                                                     |  |  |  |  |  |  |  |  |
| 7  | Support for attending meetings and/or travel                                                                 | <input checked="" type="checkbox"/> <b>None</b><br><table border="1" style="width: 100%; border-collapse: collapse;"> <tr><td style="width: 50%; height: 15px;"></td><td style="width: 50%;"></td></tr> <tr><td style="height: 15px;"></td><td></td></tr> <tr><td style="height: 15px;"></td><td></td></tr> </table>                                                   |                                                                                     |  |  |  |  |  |  |  |  |
|    |                                                                                                              |                                                                                                                                                                                                                                                                                                                                                                        |                                                                                     |  |  |  |  |  |  |  |  |
|    |                                                                                                              |                                                                                                                                                                                                                                                                                                                                                                        |                                                                                     |  |  |  |  |  |  |  |  |
|    |                                                                                                              |                                                                                                                                                                                                                                                                                                                                                                        |                                                                                     |  |  |  |  |  |  |  |  |
| 8  | Patents planned, issued or pending                                                                           | <input checked="" type="checkbox"/> <b>None</b><br><table border="1" style="width: 100%; border-collapse: collapse;"> <tr><td style="width: 50%; height: 15px;"></td><td style="width: 50%;"></td></tr> <tr><td style="height: 15px;"></td><td></td></tr> <tr><td style="height: 15px;"></td><td></td></tr> </table>                                                   |                                                                                     |  |  |  |  |  |  |  |  |
|    |                                                                                                              |                                                                                                                                                                                                                                                                                                                                                                        |                                                                                     |  |  |  |  |  |  |  |  |
|    |                                                                                                              |                                                                                                                                                                                                                                                                                                                                                                        |                                                                                     |  |  |  |  |  |  |  |  |
|    |                                                                                                              |                                                                                                                                                                                                                                                                                                                                                                        |                                                                                     |  |  |  |  |  |  |  |  |
| 9  | Participation on a Data Safety Monitoring Board or Advisory Board                                            | <input checked="" type="checkbox"/> <b>None</b><br><table border="1" style="width: 100%; border-collapse: collapse;"> <tr><td style="width: 50%; height: 15px;"></td><td style="width: 50%;"></td></tr> <tr><td style="height: 15px;"></td><td></td></tr> <tr><td style="height: 15px;"></td><td></td></tr> </table>                                                   |                                                                                     |  |  |  |  |  |  |  |  |
|    |                                                                                                              |                                                                                                                                                                                                                                                                                                                                                                        |                                                                                     |  |  |  |  |  |  |  |  |
|    |                                                                                                              |                                                                                                                                                                                                                                                                                                                                                                        |                                                                                     |  |  |  |  |  |  |  |  |
|    |                                                                                                              |                                                                                                                                                                                                                                                                                                                                                                        |                                                                                     |  |  |  |  |  |  |  |  |
| 10 | Leadership or fiduciary role in other board, society, committee or advocacy group, paid or unpaid            | <input checked="" type="checkbox"/> <b>None</b><br><table border="1" style="width: 100%; border-collapse: collapse;"> <tr><td style="width: 50%; height: 15px;"></td><td style="width: 50%;"></td></tr> <tr><td style="height: 15px;"></td><td></td></tr> <tr><td style="height: 15px;"></td><td></td></tr> </table>                                                   |                                                                                     |  |  |  |  |  |  |  |  |
|    |                                                                                                              |                                                                                                                                                                                                                                                                                                                                                                        |                                                                                     |  |  |  |  |  |  |  |  |
|    |                                                                                                              |                                                                                                                                                                                                                                                                                                                                                                        |                                                                                     |  |  |  |  |  |  |  |  |
|    |                                                                                                              |                                                                                                                                                                                                                                                                                                                                                                        |                                                                                     |  |  |  |  |  |  |  |  |

|           |                                                                                  | Name all entities with whom you have this relationship or indicate none (add rows as needed) | Specifications/Comments (e.g., if payments were made to you or to your institution) |
|-----------|----------------------------------------------------------------------------------|----------------------------------------------------------------------------------------------|-------------------------------------------------------------------------------------|
| <b>11</b> | Stock or stock options                                                           | <input checked="" type="checkbox"/> <b>None</b>                                              |                                                                                     |
|           |                                                                                  |                                                                                              |                                                                                     |
|           |                                                                                  |                                                                                              |                                                                                     |
| <b>12</b> | Receipt of equipment, materials, drugs, medical writing, gifts or other services | <input checked="" type="checkbox"/> <b>None</b>                                              |                                                                                     |
|           |                                                                                  |                                                                                              |                                                                                     |
|           |                                                                                  |                                                                                              |                                                                                     |
| <b>13</b> | Other financial or non-financial interests                                       | <input type="checkbox"/> <b>None</b>                                                         |                                                                                     |
|           |                                                                                  | Evidera, PPD, part of Thermo Fisher                                                          | Full time employee                                                                  |
|           |                                                                                  |                                                                                              |                                                                                     |
|           |                                                                                  |                                                                                              |                                                                                     |

Please place an "X" next to the following statement to indicate your agreement:

I certify that I have answered every question and have not altered the wording of any of the questions on this form.

## ICMJE DISCLOSURE FORM

**Date:** 11/2/2023

**Your Name:** Lars Lau Raket

**Manuscript Title:** The Association Between Clinical Dementia Rating and Clinical Outcomes in Alzheimer's Disease

**Manuscript Number (if known):** DADM-D-23-00125

In the interest of transparency, we ask you to disclose all relationships/activities/interests listed below that are related to the content of your manuscript. "Related" means any relation with for-profit or not-for-profit third parties whose interests may be affected by the content of the manuscript. Disclosure represents a commitment to transparency and does not necessarily indicate a bias. If you are in doubt about whether to list a relationship/activity/interest, it is preferable that you do so.

The author's relationships/activities/interests should be defined broadly. For example, if your manuscript pertains to the epidemiology of hypertension, you should declare all relationships with manufacturers of antihypertensive medication, even if that medication is not mentioned in the manuscript.

In item #1 below, report all support for the work reported in this manuscript without time limit. For all other items, the time frame for disclosure is the past 36 months.

|                                                    | Name all entities with whom you have this relationship or indicate none (add rows as needed)                                                                                   | Specifications/Comments (e.g., if payments were made to you or to your institution)                                                                                                                                                                                                                                                                                                 |                       |  |  |  |  |                                           |
|----------------------------------------------------|--------------------------------------------------------------------------------------------------------------------------------------------------------------------------------|-------------------------------------------------------------------------------------------------------------------------------------------------------------------------------------------------------------------------------------------------------------------------------------------------------------------------------------------------------------------------------------|-----------------------|--|--|--|--|-------------------------------------------|
| Time frame: Since the initial planning of the work |                                                                                                                                                                                |                                                                                                                                                                                                                                                                                                                                                                                     |                       |  |  |  |  |                                           |
| <b>1</b>                                           | All support for the present manuscript (e.g., funding, provision of study materials, medical writing, article processing charges, etc.)<br><b>No time limit for this item.</b> | <input type="checkbox"/> <b>None</b><br><table border="1" style="width: 100%; border-collapse: collapse; margin-top: 5px;"> <tr> <td style="width: 60%;">Novo Nordisk A/S</td> <td style="width: 40%;"></td> </tr> <tr> <td> </td> <td> </td> </tr> <tr> <td> </td> <td style="text-align: center; font-size: small;">Click the tab key to add additional rows.</td> </tr> </table> | Novo Nordisk A/S      |  |  |  |  | Click the tab key to add additional rows. |
| Novo Nordisk A/S                                   |                                                                                                                                                                                |                                                                                                                                                                                                                                                                                                                                                                                     |                       |  |  |  |  |                                           |
|                                                    |                                                                                                                                                                                |                                                                                                                                                                                                                                                                                                                                                                                     |                       |  |  |  |  |                                           |
|                                                    | Click the tab key to add additional rows.                                                                                                                                      |                                                                                                                                                                                                                                                                                                                                                                                     |                       |  |  |  |  |                                           |
| Time frame: past 36 months                         |                                                                                                                                                                                |                                                                                                                                                                                                                                                                                                                                                                                     |                       |  |  |  |  |                                           |
| <b>2</b>                                           | Grants or contracts from any entity (if not indicated in item #1 above).                                                                                                       | <input type="checkbox"/> <b>None</b><br><table border="1" style="width: 100%; border-collapse: collapse; margin-top: 5px;"> <tr> <td style="width: 60%;">Eli Lilly and Company</td> <td style="width: 40%;"></td> </tr> <tr> <td> </td> <td> </td> </tr> <tr> <td> </td> <td> </td> </tr> </table>                                                                                  | Eli Lilly and Company |  |  |  |  |                                           |
| Eli Lilly and Company                              |                                                                                                                                                                                |                                                                                                                                                                                                                                                                                                                                                                                     |                       |  |  |  |  |                                           |
|                                                    |                                                                                                                                                                                |                                                                                                                                                                                                                                                                                                                                                                                     |                       |  |  |  |  |                                           |
|                                                    |                                                                                                                                                                                |                                                                                                                                                                                                                                                                                                                                                                                     |                       |  |  |  |  |                                           |
| <b>3</b>                                           | Royalties or licenses                                                                                                                                                          | <input checked="" type="checkbox"/> <b>None</b><br><table border="1" style="width: 100%; border-collapse: collapse; margin-top: 5px;"> <tr> <td style="width: 60%; height: 20px;"> </td> <td style="width: 40%;"></td> </tr> <tr> <td style="height: 20px;"> </td> <td> </td> </tr> <tr> <td style="height: 20px;"> </td> <td> </td> </tr> </table>                                 |                       |  |  |  |  |                                           |
|                                                    |                                                                                                                                                                                |                                                                                                                                                                                                                                                                                                                                                                                     |                       |  |  |  |  |                                           |
|                                                    |                                                                                                                                                                                |                                                                                                                                                                                                                                                                                                                                                                                     |                       |  |  |  |  |                                           |
|                                                    |                                                                                                                                                                                |                                                                                                                                                                                                                                                                                                                                                                                     |                       |  |  |  |  |                                           |

|    |                                                                                                              | Name all entities with whom you have this relationship or indicate none (add rows as needed)                                                                                                                                                                                                                                                                           | Specifications/Comments (e.g., if payments were made to you or to your institution) |  |  |  |  |  |  |  |  |
|----|--------------------------------------------------------------------------------------------------------------|------------------------------------------------------------------------------------------------------------------------------------------------------------------------------------------------------------------------------------------------------------------------------------------------------------------------------------------------------------------------|-------------------------------------------------------------------------------------|--|--|--|--|--|--|--|--|
| 4  | Consulting fees                                                                                              | <input checked="" type="checkbox"/> <b>None</b><br><table border="1" style="width: 100%; border-collapse: collapse;"> <tr><td style="width: 50%; height: 15px;"></td><td style="width: 50%;"></td></tr> <tr><td style="height: 15px;"></td><td></td></tr> <tr><td style="height: 15px;"></td><td></td></tr> <tr><td style="height: 15px;"></td><td></td></tr> </table> |                                                                                     |  |  |  |  |  |  |  |  |
|    |                                                                                                              |                                                                                                                                                                                                                                                                                                                                                                        |                                                                                     |  |  |  |  |  |  |  |  |
|    |                                                                                                              |                                                                                                                                                                                                                                                                                                                                                                        |                                                                                     |  |  |  |  |  |  |  |  |
|    |                                                                                                              |                                                                                                                                                                                                                                                                                                                                                                        |                                                                                     |  |  |  |  |  |  |  |  |
|    |                                                                                                              |                                                                                                                                                                                                                                                                                                                                                                        |                                                                                     |  |  |  |  |  |  |  |  |
| 5  | Payment or honoraria for lectures, presentations, speakers bureaus, manuscript writing or educational events | <input checked="" type="checkbox"/> <b>None</b><br><table border="1" style="width: 100%; border-collapse: collapse;"> <tr><td style="width: 50%; height: 15px;"></td><td style="width: 50%;"></td></tr> <tr><td style="height: 15px;"></td><td></td></tr> <tr><td style="height: 15px;"></td><td></td></tr> </table>                                                   |                                                                                     |  |  |  |  |  |  |  |  |
|    |                                                                                                              |                                                                                                                                                                                                                                                                                                                                                                        |                                                                                     |  |  |  |  |  |  |  |  |
|    |                                                                                                              |                                                                                                                                                                                                                                                                                                                                                                        |                                                                                     |  |  |  |  |  |  |  |  |
|    |                                                                                                              |                                                                                                                                                                                                                                                                                                                                                                        |                                                                                     |  |  |  |  |  |  |  |  |
| 6  | Payment for expert testimony                                                                                 | <input checked="" type="checkbox"/> <b>None</b><br><table border="1" style="width: 100%; border-collapse: collapse;"> <tr><td style="width: 50%; height: 15px;"></td><td style="width: 50%;"></td></tr> <tr><td style="height: 15px;"></td><td></td></tr> <tr><td style="height: 15px;"></td><td></td></tr> </table>                                                   |                                                                                     |  |  |  |  |  |  |  |  |
|    |                                                                                                              |                                                                                                                                                                                                                                                                                                                                                                        |                                                                                     |  |  |  |  |  |  |  |  |
|    |                                                                                                              |                                                                                                                                                                                                                                                                                                                                                                        |                                                                                     |  |  |  |  |  |  |  |  |
|    |                                                                                                              |                                                                                                                                                                                                                                                                                                                                                                        |                                                                                     |  |  |  |  |  |  |  |  |
| 7  | Support for attending meetings and/or travel                                                                 | <input checked="" type="checkbox"/> <b>None</b><br><table border="1" style="width: 100%; border-collapse: collapse;"> <tr><td style="width: 50%; height: 15px;"></td><td style="width: 50%;"></td></tr> <tr><td style="height: 15px;"></td><td></td></tr> <tr><td style="height: 15px;"></td><td></td></tr> </table>                                                   |                                                                                     |  |  |  |  |  |  |  |  |
|    |                                                                                                              |                                                                                                                                                                                                                                                                                                                                                                        |                                                                                     |  |  |  |  |  |  |  |  |
|    |                                                                                                              |                                                                                                                                                                                                                                                                                                                                                                        |                                                                                     |  |  |  |  |  |  |  |  |
|    |                                                                                                              |                                                                                                                                                                                                                                                                                                                                                                        |                                                                                     |  |  |  |  |  |  |  |  |
| 8  | Patents planned, issued or pending                                                                           | <input checked="" type="checkbox"/> <b>None</b><br><table border="1" style="width: 100%; border-collapse: collapse;"> <tr><td style="width: 50%; height: 15px;"></td><td style="width: 50%;"></td></tr> <tr><td style="height: 15px;"></td><td></td></tr> <tr><td style="height: 15px;"></td><td></td></tr> </table>                                                   |                                                                                     |  |  |  |  |  |  |  |  |
|    |                                                                                                              |                                                                                                                                                                                                                                                                                                                                                                        |                                                                                     |  |  |  |  |  |  |  |  |
|    |                                                                                                              |                                                                                                                                                                                                                                                                                                                                                                        |                                                                                     |  |  |  |  |  |  |  |  |
|    |                                                                                                              |                                                                                                                                                                                                                                                                                                                                                                        |                                                                                     |  |  |  |  |  |  |  |  |
| 9  | Participation on a Data Safety Monitoring Board or Advisory Board                                            | <input checked="" type="checkbox"/> <b>None</b><br><table border="1" style="width: 100%; border-collapse: collapse;"> <tr><td style="width: 50%; height: 15px;"></td><td style="width: 50%;"></td></tr> <tr><td style="height: 15px;"></td><td></td></tr> <tr><td style="height: 15px;"></td><td></td></tr> </table>                                                   |                                                                                     |  |  |  |  |  |  |  |  |
|    |                                                                                                              |                                                                                                                                                                                                                                                                                                                                                                        |                                                                                     |  |  |  |  |  |  |  |  |
|    |                                                                                                              |                                                                                                                                                                                                                                                                                                                                                                        |                                                                                     |  |  |  |  |  |  |  |  |
|    |                                                                                                              |                                                                                                                                                                                                                                                                                                                                                                        |                                                                                     |  |  |  |  |  |  |  |  |
| 10 | Leadership or fiduciary role in other board, society, committee or advocacy group, paid or unpaid            | <input checked="" type="checkbox"/> <b>None</b><br><table border="1" style="width: 100%; border-collapse: collapse;"> <tr><td style="width: 50%; height: 15px;"></td><td style="width: 50%;"></td></tr> <tr><td style="height: 15px;"></td><td></td></tr> <tr><td style="height: 15px;"></td><td></td></tr> </table>                                                   |                                                                                     |  |  |  |  |  |  |  |  |
|    |                                                                                                              |                                                                                                                                                                                                                                                                                                                                                                        |                                                                                     |  |  |  |  |  |  |  |  |
|    |                                                                                                              |                                                                                                                                                                                                                                                                                                                                                                        |                                                                                     |  |  |  |  |  |  |  |  |
|    |                                                                                                              |                                                                                                                                                                                                                                                                                                                                                                        |                                                                                     |  |  |  |  |  |  |  |  |

|           |                                                                                  | Name all entities with whom you have this relationship or indicate none (add rows as needed)                                                                                                                                                                                                                         | Specifications/Comments (e.g., if payments were made to you or to your institution) |  |  |  |  |  |  |
|-----------|----------------------------------------------------------------------------------|----------------------------------------------------------------------------------------------------------------------------------------------------------------------------------------------------------------------------------------------------------------------------------------------------------------------|-------------------------------------------------------------------------------------|--|--|--|--|--|--|
| <b>11</b> | Stock or stock options                                                           | <input checked="" type="checkbox"/> <b>None</b><br><table border="1" style="width: 100%; border-collapse: collapse;"> <tr><td style="width: 50%; height: 20px;"></td><td style="width: 50%;"></td></tr> <tr><td style="height: 20px;"></td><td></td></tr> <tr><td style="height: 20px;"></td><td></td></tr> </table> |                                                                                     |  |  |  |  |  |  |
|           |                                                                                  |                                                                                                                                                                                                                                                                                                                      |                                                                                     |  |  |  |  |  |  |
|           |                                                                                  |                                                                                                                                                                                                                                                                                                                      |                                                                                     |  |  |  |  |  |  |
|           |                                                                                  |                                                                                                                                                                                                                                                                                                                      |                                                                                     |  |  |  |  |  |  |
| <b>12</b> | Receipt of equipment, materials, drugs, medical writing, gifts or other services | <input checked="" type="checkbox"/> <b>None</b><br><table border="1" style="width: 100%; border-collapse: collapse;"> <tr><td style="width: 50%; height: 20px;"></td><td style="width: 50%;"></td></tr> <tr><td style="height: 20px;"></td><td></td></tr> <tr><td style="height: 20px;"></td><td></td></tr> </table> |                                                                                     |  |  |  |  |  |  |
|           |                                                                                  |                                                                                                                                                                                                                                                                                                                      |                                                                                     |  |  |  |  |  |  |
|           |                                                                                  |                                                                                                                                                                                                                                                                                                                      |                                                                                     |  |  |  |  |  |  |
|           |                                                                                  |                                                                                                                                                                                                                                                                                                                      |                                                                                     |  |  |  |  |  |  |
| <b>13</b> | Other financial or non-financial interests                                       | <input checked="" type="checkbox"/> <b>None</b><br><table border="1" style="width: 100%; border-collapse: collapse;"> <tr><td style="width: 50%; height: 20px;"></td><td style="width: 50%;"></td></tr> <tr><td style="height: 20px;"></td><td></td></tr> <tr><td style="height: 20px;"></td><td></td></tr> </table> |                                                                                     |  |  |  |  |  |  |
|           |                                                                                  |                                                                                                                                                                                                                                                                                                                      |                                                                                     |  |  |  |  |  |  |
|           |                                                                                  |                                                                                                                                                                                                                                                                                                                      |                                                                                     |  |  |  |  |  |  |
|           |                                                                                  |                                                                                                                                                                                                                                                                                                                      |                                                                                     |  |  |  |  |  |  |

**Please place an "X" next to the following statement to indicate your agreement:**

I certify that I have answered every question and have not altered the wording of any of the questions on this form.

## ICMJE DISCLOSURE FORM

**Date:** 11/7/2023

**Your Name:** Cynthia Saiontz-Martinez

**Manuscript Title:** The Association Between Clinical Dementia Rating and Clinical Outcomes in Alzheimer's Disease

**Manuscript Number (if known):** DADM-D-23-00125

In the interest of transparency, we ask you to disclose all relationships/activities/interests listed below that are related to the content of your manuscript. "Related" means any relation with for-profit or not-for-profit third parties whose interests may be affected by the content of the manuscript. Disclosure represents a commitment to transparency and does not necessarily indicate a bias. If you are in doubt about whether to list a relationship/activity/interest, it is preferable that you do so.

The author's relationships/activities/interests should be defined broadly. For example, if your manuscript pertains to the epidemiology of hypertension, you should declare all relationships with manufacturers of antihypertensive medication, even if that medication is not mentioned in the manuscript.

In item #1 below, report all support for the work reported in this manuscript without time limit. For all other items, the time frame for disclosure is the past 36 months.

|                                                           |                                                                                                                                                                                | Name all entities with whom you have this relationship or indicate none (add rows as needed)                                                                                                                                               | Specifications/Comments (e.g., if payments were made to you or to your institution) |  |  |  |  |  |                                                                                                                                           |
|-----------------------------------------------------------|--------------------------------------------------------------------------------------------------------------------------------------------------------------------------------|--------------------------------------------------------------------------------------------------------------------------------------------------------------------------------------------------------------------------------------------|-------------------------------------------------------------------------------------|--|--|--|--|--|-------------------------------------------------------------------------------------------------------------------------------------------|
| <b>Time frame: Since the initial planning of the work</b> |                                                                                                                                                                                |                                                                                                                                                                                                                                            |                                                                                     |  |  |  |  |  |                                                                                                                                           |
| <b>1</b>                                                  | All support for the present manuscript (e.g., funding, provision of study materials, medical writing, article processing charges, etc.)<br><b>No time limit for this item.</b> | <input checked="" type="checkbox"/> <b>None</b><br><table border="1" style="width: 100%; height: 40px; margin-top: 5px;"> <tr><td style="width: 60%;"></td><td></td></tr> <tr><td></td><td></td></tr> <tr><td></td><td></td></tr> </table> |                                                                                     |  |  |  |  |  | <div style="border: 1px solid black; padding: 2px; font-size: small; text-align: center;">Click the tab key to add additional rows.</div> |
|                                                           |                                                                                                                                                                                |                                                                                                                                                                                                                                            |                                                                                     |  |  |  |  |  |                                                                                                                                           |
|                                                           |                                                                                                                                                                                |                                                                                                                                                                                                                                            |                                                                                     |  |  |  |  |  |                                                                                                                                           |
|                                                           |                                                                                                                                                                                |                                                                                                                                                                                                                                            |                                                                                     |  |  |  |  |  |                                                                                                                                           |
| <b>Time frame: past 36 months</b>                         |                                                                                                                                                                                |                                                                                                                                                                                                                                            |                                                                                     |  |  |  |  |  |                                                                                                                                           |
| <b>2</b>                                                  | Grants or contracts from any entity (if not indicated in item #1 above).                                                                                                       | <input checked="" type="checkbox"/> <b>None</b><br><table border="1" style="width: 100%; height: 40px; margin-top: 5px;"> <tr><td style="width: 60%;"></td><td></td></tr> <tr><td></td><td></td></tr> <tr><td></td><td></td></tr> </table> |                                                                                     |  |  |  |  |  |                                                                                                                                           |
|                                                           |                                                                                                                                                                                |                                                                                                                                                                                                                                            |                                                                                     |  |  |  |  |  |                                                                                                                                           |
|                                                           |                                                                                                                                                                                |                                                                                                                                                                                                                                            |                                                                                     |  |  |  |  |  |                                                                                                                                           |
|                                                           |                                                                                                                                                                                |                                                                                                                                                                                                                                            |                                                                                     |  |  |  |  |  |                                                                                                                                           |
| <b>3</b>                                                  | Royalties or licenses                                                                                                                                                          | <input checked="" type="checkbox"/> <b>None</b><br><table border="1" style="width: 100%; height: 40px; margin-top: 5px;"> <tr><td style="width: 60%;"></td><td></td></tr> <tr><td></td><td></td></tr> <tr><td></td><td></td></tr> </table> |                                                                                     |  |  |  |  |  |                                                                                                                                           |
|                                                           |                                                                                                                                                                                |                                                                                                                                                                                                                                            |                                                                                     |  |  |  |  |  |                                                                                                                                           |
|                                                           |                                                                                                                                                                                |                                                                                                                                                                                                                                            |                                                                                     |  |  |  |  |  |                                                                                                                                           |
|                                                           |                                                                                                                                                                                |                                                                                                                                                                                                                                            |                                                                                     |  |  |  |  |  |                                                                                                                                           |

|    |                                                                                                              | Name all entities with whom you have this relationship or indicate none (add rows as needed)                                                                                                                                                                                                                                                                           | Specifications/Comments (e.g., if payments were made to you or to your institution) |  |  |  |  |  |  |  |  |
|----|--------------------------------------------------------------------------------------------------------------|------------------------------------------------------------------------------------------------------------------------------------------------------------------------------------------------------------------------------------------------------------------------------------------------------------------------------------------------------------------------|-------------------------------------------------------------------------------------|--|--|--|--|--|--|--|--|
| 4  | Consulting fees                                                                                              | <input checked="" type="checkbox"/> <b>None</b><br><table border="1" style="width: 100%; border-collapse: collapse;"> <tr><td style="width: 50%; height: 15px;"></td><td style="width: 50%;"></td></tr> <tr><td style="height: 15px;"></td><td></td></tr> <tr><td style="height: 15px;"></td><td></td></tr> <tr><td style="height: 15px;"></td><td></td></tr> </table> |                                                                                     |  |  |  |  |  |  |  |  |
|    |                                                                                                              |                                                                                                                                                                                                                                                                                                                                                                        |                                                                                     |  |  |  |  |  |  |  |  |
|    |                                                                                                              |                                                                                                                                                                                                                                                                                                                                                                        |                                                                                     |  |  |  |  |  |  |  |  |
|    |                                                                                                              |                                                                                                                                                                                                                                                                                                                                                                        |                                                                                     |  |  |  |  |  |  |  |  |
|    |                                                                                                              |                                                                                                                                                                                                                                                                                                                                                                        |                                                                                     |  |  |  |  |  |  |  |  |
| 5  | Payment or honoraria for lectures, presentations, speakers bureaus, manuscript writing or educational events | <input checked="" type="checkbox"/> <b>None</b><br><table border="1" style="width: 100%; border-collapse: collapse;"> <tr><td style="width: 50%; height: 15px;"></td><td style="width: 50%;"></td></tr> <tr><td style="height: 15px;"></td><td></td></tr> <tr><td style="height: 15px;"></td><td></td></tr> </table>                                                   |                                                                                     |  |  |  |  |  |  |  |  |
|    |                                                                                                              |                                                                                                                                                                                                                                                                                                                                                                        |                                                                                     |  |  |  |  |  |  |  |  |
|    |                                                                                                              |                                                                                                                                                                                                                                                                                                                                                                        |                                                                                     |  |  |  |  |  |  |  |  |
|    |                                                                                                              |                                                                                                                                                                                                                                                                                                                                                                        |                                                                                     |  |  |  |  |  |  |  |  |
| 6  | Payment for expert testimony                                                                                 | <input checked="" type="checkbox"/> <b>None</b><br><table border="1" style="width: 100%; border-collapse: collapse;"> <tr><td style="width: 50%; height: 15px;"></td><td style="width: 50%;"></td></tr> <tr><td style="height: 15px;"></td><td></td></tr> <tr><td style="height: 15px;"></td><td></td></tr> </table>                                                   |                                                                                     |  |  |  |  |  |  |  |  |
|    |                                                                                                              |                                                                                                                                                                                                                                                                                                                                                                        |                                                                                     |  |  |  |  |  |  |  |  |
|    |                                                                                                              |                                                                                                                                                                                                                                                                                                                                                                        |                                                                                     |  |  |  |  |  |  |  |  |
|    |                                                                                                              |                                                                                                                                                                                                                                                                                                                                                                        |                                                                                     |  |  |  |  |  |  |  |  |
| 7  | Support for attending meetings and/or travel                                                                 | <input checked="" type="checkbox"/> <b>None</b><br><table border="1" style="width: 100%; border-collapse: collapse;"> <tr><td style="width: 50%; height: 15px;"></td><td style="width: 50%;"></td></tr> <tr><td style="height: 15px;"></td><td></td></tr> <tr><td style="height: 15px;"></td><td></td></tr> </table>                                                   |                                                                                     |  |  |  |  |  |  |  |  |
|    |                                                                                                              |                                                                                                                                                                                                                                                                                                                                                                        |                                                                                     |  |  |  |  |  |  |  |  |
|    |                                                                                                              |                                                                                                                                                                                                                                                                                                                                                                        |                                                                                     |  |  |  |  |  |  |  |  |
|    |                                                                                                              |                                                                                                                                                                                                                                                                                                                                                                        |                                                                                     |  |  |  |  |  |  |  |  |
| 8  | Patents planned, issued or pending                                                                           | <input checked="" type="checkbox"/> <b>None</b><br><table border="1" style="width: 100%; border-collapse: collapse;"> <tr><td style="width: 50%; height: 15px;"></td><td style="width: 50%;"></td></tr> <tr><td style="height: 15px;"></td><td></td></tr> <tr><td style="height: 15px;"></td><td></td></tr> </table>                                                   |                                                                                     |  |  |  |  |  |  |  |  |
|    |                                                                                                              |                                                                                                                                                                                                                                                                                                                                                                        |                                                                                     |  |  |  |  |  |  |  |  |
|    |                                                                                                              |                                                                                                                                                                                                                                                                                                                                                                        |                                                                                     |  |  |  |  |  |  |  |  |
|    |                                                                                                              |                                                                                                                                                                                                                                                                                                                                                                        |                                                                                     |  |  |  |  |  |  |  |  |
| 9  | Participation on a Data Safety Monitoring Board or Advisory Board                                            | <input checked="" type="checkbox"/> <b>None</b><br><table border="1" style="width: 100%; border-collapse: collapse;"> <tr><td style="width: 50%; height: 15px;"></td><td style="width: 50%;"></td></tr> <tr><td style="height: 15px;"></td><td></td></tr> <tr><td style="height: 15px;"></td><td></td></tr> </table>                                                   |                                                                                     |  |  |  |  |  |  |  |  |
|    |                                                                                                              |                                                                                                                                                                                                                                                                                                                                                                        |                                                                                     |  |  |  |  |  |  |  |  |
|    |                                                                                                              |                                                                                                                                                                                                                                                                                                                                                                        |                                                                                     |  |  |  |  |  |  |  |  |
|    |                                                                                                              |                                                                                                                                                                                                                                                                                                                                                                        |                                                                                     |  |  |  |  |  |  |  |  |
| 10 | Leadership or fiduciary role in other board, society, committee or advocacy group, paid or unpaid            | <input checked="" type="checkbox"/> <b>None</b><br><table border="1" style="width: 100%; border-collapse: collapse;"> <tr><td style="width: 50%; height: 15px;"></td><td style="width: 50%;"></td></tr> <tr><td style="height: 15px;"></td><td></td></tr> <tr><td style="height: 15px;"></td><td></td></tr> </table>                                                   |                                                                                     |  |  |  |  |  |  |  |  |
|    |                                                                                                              |                                                                                                                                                                                                                                                                                                                                                                        |                                                                                     |  |  |  |  |  |  |  |  |
|    |                                                                                                              |                                                                                                                                                                                                                                                                                                                                                                        |                                                                                     |  |  |  |  |  |  |  |  |
|    |                                                                                                              |                                                                                                                                                                                                                                                                                                                                                                        |                                                                                     |  |  |  |  |  |  |  |  |

|           |                                                                                  | Name all entities with whom you have this relationship or indicate none (add rows as needed) | Specifications/Comments (e.g., if payments were made to you or to your institution) |
|-----------|----------------------------------------------------------------------------------|----------------------------------------------------------------------------------------------|-------------------------------------------------------------------------------------|
| <b>11</b> | Stock or stock options                                                           | <input checked="" type="checkbox"/> <b>None</b>                                              |                                                                                     |
|           |                                                                                  |                                                                                              |                                                                                     |
|           |                                                                                  |                                                                                              |                                                                                     |
| <b>12</b> | Receipt of equipment, materials, drugs, medical writing, gifts or other services | <input checked="" type="checkbox"/> <b>None</b>                                              |                                                                                     |
|           |                                                                                  |                                                                                              |                                                                                     |
|           |                                                                                  |                                                                                              |                                                                                     |
| <b>13</b> | Other financial or non-financial interests                                       | <input type="checkbox"/> <b>None</b>                                                         |                                                                                     |
|           |                                                                                  | Evidera, PPD, part of Thermo Fisher                                                          | Full time employee                                                                  |
|           |                                                                                  |                                                                                              |                                                                                     |
|           |                                                                                  |                                                                                              |                                                                                     |

Please place an "X" next to the following statement to indicate your agreement:

I certify that I have answered every question and have not altered the wording of any of the questions on this form.

## ICMJE DISCLOSURE FORM

**Date:** 11/7/2023

**Your Name:** Wojciech Michalak

**Manuscript Title:** The Association Between Clinical Dementia Rating and Clinical Outcomes in Alzheimer's Disease

**Manuscript Number (if known):** DADM-D-23-00125

In the interest of transparency, we ask you to disclose all relationships/activities/interests listed below that are related to the content of your manuscript. "Related" means any relation with for-profit or not-for-profit third parties whose interests may be affected by the content of the manuscript. Disclosure represents a commitment to transparency and does not necessarily indicate a bias. If you are in doubt about whether to list a relationship/activity/interest, it is preferable that you do so.

The author's relationships/activities/interests should be defined broadly. For example, if your manuscript pertains to the epidemiology of hypertension, you should declare all relationships with manufacturers of antihypertensive medication, even if that medication is not mentioned in the manuscript.

In item #1 below, report all support for the work reported in this manuscript without time limit. For all other items, the time frame for disclosure is the past 36 months.

|                                                    | Name all entities with whom you have this relationship or indicate none (add rows as needed)                                                                                   | Specifications/Comments (e.g., if payments were made to you or to your institution)                                                                                                                                                                                                                                                                   |  |  |  |  |  |  |
|----------------------------------------------------|--------------------------------------------------------------------------------------------------------------------------------------------------------------------------------|-------------------------------------------------------------------------------------------------------------------------------------------------------------------------------------------------------------------------------------------------------------------------------------------------------------------------------------------------------|--|--|--|--|--|--|
| Time frame: Since the initial planning of the work |                                                                                                                                                                                |                                                                                                                                                                                                                                                                                                                                                       |  |  |  |  |  |  |
| <b>1</b>                                           | All support for the present manuscript (e.g., funding, provision of study materials, medical writing, article processing charges, etc.)<br><b>No time limit for this item.</b> | <input checked="" type="checkbox"/> <b>None</b><br><table border="1" style="width: 100%; height: 40px; margin-top: 5px;"> <tr><td style="width: 60%;"></td><td></td></tr> <tr><td></td><td></td></tr> <tr><td></td><td></td></tr> </table> <p style="font-size: small; color: gray; text-align: right;">Click the tab key to add additional rows.</p> |  |  |  |  |  |  |
|                                                    |                                                                                                                                                                                |                                                                                                                                                                                                                                                                                                                                                       |  |  |  |  |  |  |
|                                                    |                                                                                                                                                                                |                                                                                                                                                                                                                                                                                                                                                       |  |  |  |  |  |  |
|                                                    |                                                                                                                                                                                |                                                                                                                                                                                                                                                                                                                                                       |  |  |  |  |  |  |
| Time frame: past 36 months                         |                                                                                                                                                                                |                                                                                                                                                                                                                                                                                                                                                       |  |  |  |  |  |  |
| <b>2</b>                                           | Grants or contracts from any entity (if not indicated in item #1 above).                                                                                                       | <input checked="" type="checkbox"/> <b>None</b><br><table border="1" style="width: 100%; height: 40px; margin-top: 5px;"> <tr><td style="width: 60%;"></td><td></td></tr> <tr><td></td><td></td></tr> <tr><td></td><td></td></tr> </table>                                                                                                            |  |  |  |  |  |  |
|                                                    |                                                                                                                                                                                |                                                                                                                                                                                                                                                                                                                                                       |  |  |  |  |  |  |
|                                                    |                                                                                                                                                                                |                                                                                                                                                                                                                                                                                                                                                       |  |  |  |  |  |  |
|                                                    |                                                                                                                                                                                |                                                                                                                                                                                                                                                                                                                                                       |  |  |  |  |  |  |
| <b>3</b>                                           | Royalties or licenses                                                                                                                                                          | <input checked="" type="checkbox"/> <b>None</b><br><table border="1" style="width: 100%; height: 40px; margin-top: 5px;"> <tr><td style="width: 60%;"></td><td></td></tr> <tr><td></td><td></td></tr> <tr><td></td><td></td></tr> </table>                                                                                                            |  |  |  |  |  |  |
|                                                    |                                                                                                                                                                                |                                                                                                                                                                                                                                                                                                                                                       |  |  |  |  |  |  |
|                                                    |                                                                                                                                                                                |                                                                                                                                                                                                                                                                                                                                                       |  |  |  |  |  |  |
|                                                    |                                                                                                                                                                                |                                                                                                                                                                                                                                                                                                                                                       |  |  |  |  |  |  |

|    |                                                                                                              | Name all entities with whom you have this relationship or indicate none (add rows as needed)                                                                                                                                                                                                                                                                           | Specifications/Comments (e.g., if payments were made to you or to your institution) |  |  |  |  |  |  |  |  |
|----|--------------------------------------------------------------------------------------------------------------|------------------------------------------------------------------------------------------------------------------------------------------------------------------------------------------------------------------------------------------------------------------------------------------------------------------------------------------------------------------------|-------------------------------------------------------------------------------------|--|--|--|--|--|--|--|--|
| 4  | Consulting fees                                                                                              | <input checked="" type="checkbox"/> <b>None</b><br><table border="1" style="width: 100%; border-collapse: collapse;"> <tr><td style="width: 50%; height: 15px;"></td><td style="width: 50%;"></td></tr> <tr><td style="height: 15px;"></td><td></td></tr> <tr><td style="height: 15px;"></td><td></td></tr> <tr><td style="height: 15px;"></td><td></td></tr> </table> |                                                                                     |  |  |  |  |  |  |  |  |
|    |                                                                                                              |                                                                                                                                                                                                                                                                                                                                                                        |                                                                                     |  |  |  |  |  |  |  |  |
|    |                                                                                                              |                                                                                                                                                                                                                                                                                                                                                                        |                                                                                     |  |  |  |  |  |  |  |  |
|    |                                                                                                              |                                                                                                                                                                                                                                                                                                                                                                        |                                                                                     |  |  |  |  |  |  |  |  |
|    |                                                                                                              |                                                                                                                                                                                                                                                                                                                                                                        |                                                                                     |  |  |  |  |  |  |  |  |
| 5  | Payment or honoraria for lectures, presentations, speakers bureaus, manuscript writing or educational events | <input checked="" type="checkbox"/> <b>None</b><br><table border="1" style="width: 100%; border-collapse: collapse;"> <tr><td style="width: 50%; height: 15px;"></td><td style="width: 50%;"></td></tr> <tr><td style="height: 15px;"></td><td></td></tr> <tr><td style="height: 15px;"></td><td></td></tr> </table>                                                   |                                                                                     |  |  |  |  |  |  |  |  |
|    |                                                                                                              |                                                                                                                                                                                                                                                                                                                                                                        |                                                                                     |  |  |  |  |  |  |  |  |
|    |                                                                                                              |                                                                                                                                                                                                                                                                                                                                                                        |                                                                                     |  |  |  |  |  |  |  |  |
|    |                                                                                                              |                                                                                                                                                                                                                                                                                                                                                                        |                                                                                     |  |  |  |  |  |  |  |  |
| 6  | Payment for expert testimony                                                                                 | <input checked="" type="checkbox"/> <b>None</b><br><table border="1" style="width: 100%; border-collapse: collapse;"> <tr><td style="width: 50%; height: 15px;"></td><td style="width: 50%;"></td></tr> <tr><td style="height: 15px;"></td><td></td></tr> <tr><td style="height: 15px;"></td><td></td></tr> </table>                                                   |                                                                                     |  |  |  |  |  |  |  |  |
|    |                                                                                                              |                                                                                                                                                                                                                                                                                                                                                                        |                                                                                     |  |  |  |  |  |  |  |  |
|    |                                                                                                              |                                                                                                                                                                                                                                                                                                                                                                        |                                                                                     |  |  |  |  |  |  |  |  |
|    |                                                                                                              |                                                                                                                                                                                                                                                                                                                                                                        |                                                                                     |  |  |  |  |  |  |  |  |
| 7  | Support for attending meetings and/or travel                                                                 | <input checked="" type="checkbox"/> <b>None</b><br><table border="1" style="width: 100%; border-collapse: collapse;"> <tr><td style="width: 50%; height: 15px;"></td><td style="width: 50%;"></td></tr> <tr><td style="height: 15px;"></td><td></td></tr> <tr><td style="height: 15px;"></td><td></td></tr> </table>                                                   |                                                                                     |  |  |  |  |  |  |  |  |
|    |                                                                                                              |                                                                                                                                                                                                                                                                                                                                                                        |                                                                                     |  |  |  |  |  |  |  |  |
|    |                                                                                                              |                                                                                                                                                                                                                                                                                                                                                                        |                                                                                     |  |  |  |  |  |  |  |  |
|    |                                                                                                              |                                                                                                                                                                                                                                                                                                                                                                        |                                                                                     |  |  |  |  |  |  |  |  |
| 8  | Patents planned, issued or pending                                                                           | <input checked="" type="checkbox"/> <b>None</b><br><table border="1" style="width: 100%; border-collapse: collapse;"> <tr><td style="width: 50%; height: 15px;"></td><td style="width: 50%;"></td></tr> <tr><td style="height: 15px;"></td><td></td></tr> <tr><td style="height: 15px;"></td><td></td></tr> </table>                                                   |                                                                                     |  |  |  |  |  |  |  |  |
|    |                                                                                                              |                                                                                                                                                                                                                                                                                                                                                                        |                                                                                     |  |  |  |  |  |  |  |  |
|    |                                                                                                              |                                                                                                                                                                                                                                                                                                                                                                        |                                                                                     |  |  |  |  |  |  |  |  |
|    |                                                                                                              |                                                                                                                                                                                                                                                                                                                                                                        |                                                                                     |  |  |  |  |  |  |  |  |
| 9  | Participation on a Data Safety Monitoring Board or Advisory Board                                            | <input checked="" type="checkbox"/> <b>None</b><br><table border="1" style="width: 100%; border-collapse: collapse;"> <tr><td style="width: 50%; height: 15px;"></td><td style="width: 50%;"></td></tr> <tr><td style="height: 15px;"></td><td></td></tr> <tr><td style="height: 15px;"></td><td></td></tr> </table>                                                   |                                                                                     |  |  |  |  |  |  |  |  |
|    |                                                                                                              |                                                                                                                                                                                                                                                                                                                                                                        |                                                                                     |  |  |  |  |  |  |  |  |
|    |                                                                                                              |                                                                                                                                                                                                                                                                                                                                                                        |                                                                                     |  |  |  |  |  |  |  |  |
|    |                                                                                                              |                                                                                                                                                                                                                                                                                                                                                                        |                                                                                     |  |  |  |  |  |  |  |  |
| 10 | Leadership or fiduciary role in other board, society, committee or advocacy group, paid or unpaid            | <input checked="" type="checkbox"/> <b>None</b><br><table border="1" style="width: 100%; border-collapse: collapse;"> <tr><td style="width: 50%; height: 15px;"></td><td style="width: 50%;"></td></tr> <tr><td style="height: 15px;"></td><td></td></tr> <tr><td style="height: 15px;"></td><td></td></tr> </table>                                                   |                                                                                     |  |  |  |  |  |  |  |  |
|    |                                                                                                              |                                                                                                                                                                                                                                                                                                                                                                        |                                                                                     |  |  |  |  |  |  |  |  |
|    |                                                                                                              |                                                                                                                                                                                                                                                                                                                                                                        |                                                                                     |  |  |  |  |  |  |  |  |
|    |                                                                                                              |                                                                                                                                                                                                                                                                                                                                                                        |                                                                                     |  |  |  |  |  |  |  |  |

|    |                                                                                  | Name all entities with whom you have this relationship or indicate none (add rows as needed) | Specifications/Comments (e.g., if payments were made to you or to your institution) |
|----|----------------------------------------------------------------------------------|----------------------------------------------------------------------------------------------|-------------------------------------------------------------------------------------|
| 11 | Stock or stock options                                                           | <input checked="" type="checkbox"/> None                                                     |                                                                                     |
|    |                                                                                  | Novo Nordisk Inc.                                                                            | Stock & Stock Option holder                                                         |
|    |                                                                                  |                                                                                              |                                                                                     |
|    |                                                                                  |                                                                                              |                                                                                     |
| 12 | Receipt of equipment, materials, drugs, medical writing, gifts or other services | <input checked="" type="checkbox"/> None                                                     |                                                                                     |
|    |                                                                                  |                                                                                              |                                                                                     |
|    |                                                                                  |                                                                                              |                                                                                     |
|    |                                                                                  |                                                                                              |                                                                                     |
| 13 | Other financial or non-financial interests                                       | <input type="checkbox"/> None                                                                |                                                                                     |
|    |                                                                                  | Novo Nordisk Inc.                                                                            | Full time employee of.                                                              |
|    |                                                                                  |                                                                                              |                                                                                     |
|    |                                                                                  |                                                                                              |                                                                                     |

Please place an "X" next to the following statement to indicate your agreement:

I certify that I have answered every question and have not altered the wording of any of the questions on this form.

## ICMJE DISCLOSURE FORM

**Date:** 11/2/2023

**Your Name:** Wendy Weidner

**Manuscript Title:** The Association Between Clinical Dementia Rating and Clinical Outcomes in Alzheimer's Disease

**Manuscript Number (if known):** DADM-D-23-00125

In the interest of transparency, we ask you to disclose all relationships/activities/interests listed below that are related to the content of your manuscript. "Related" means any relation with for-profit or not-for-profit third parties whose interests may be affected by the content of the manuscript. Disclosure represents a commitment to transparency and does not necessarily indicate a bias. If you are in doubt about whether to list a relationship/activity/interest, it is preferable that you do so.

The author's relationships/activities/interests should be defined broadly. For example, if your manuscript pertains to the epidemiology of hypertension, you should declare all relationships with manufacturers of antihypertensive medication, even if that medication is not mentioned in the manuscript.

In item #1 below, report all support for the work reported in this manuscript without time limit. For all other items, the time frame for disclosure is the past 36 months.

|                                                                                                                                                                                             |                                                                                                                                                                                | Name all entities with whom you have this relationship or indicate none (add rows as needed)                                                                                                                                                                                                                                                                                                                                                                                    | Specifications/Comments (e.g., if payments were made to you or to your institution) |             |                                                                                                                                                                                             |             |  |  |                                                                                                                                                                                                                                                                                                  |  |  |  |  |  |  |
|---------------------------------------------------------------------------------------------------------------------------------------------------------------------------------------------|--------------------------------------------------------------------------------------------------------------------------------------------------------------------------------|---------------------------------------------------------------------------------------------------------------------------------------------------------------------------------------------------------------------------------------------------------------------------------------------------------------------------------------------------------------------------------------------------------------------------------------------------------------------------------|-------------------------------------------------------------------------------------|-------------|---------------------------------------------------------------------------------------------------------------------------------------------------------------------------------------------|-------------|--|--|--------------------------------------------------------------------------------------------------------------------------------------------------------------------------------------------------------------------------------------------------------------------------------------------------|--|--|--|--|--|--|
| <b>Time frame: Since the initial planning of the work</b>                                                                                                                                   |                                                                                                                                                                                |                                                                                                                                                                                                                                                                                                                                                                                                                                                                                 |                                                                                     |             |                                                                                                                                                                                             |             |  |  |                                                                                                                                                                                                                                                                                                  |  |  |  |  |  |  |
| <b>1</b>                                                                                                                                                                                    | All support for the present manuscript (e.g., funding, provision of study materials, medical writing, article processing charges, etc.)<br><b>No time limit for this item.</b> | <input checked="" type="checkbox"/> <b>None</b><br><table border="1" style="width: 100%; height: 40px; margin-top: 5px;"> <tr><td style="width: 60%;"></td><td></td></tr> <tr><td></td><td></td></tr> <tr><td></td><td></td></tr> </table>                                                                                                                                                                                                                                      |                                                                                     |             |                                                                                                                                                                                             |             |  |  | <table border="1" style="width: 100%; height: 40px; margin-top: 5px;"> <tr><td style="width: 60%;"></td><td></td></tr> <tr><td></td><td></td></tr> <tr><td></td><td></td></tr> </table> <p style="font-size: small; color: gray; margin-top: 5px;">Click the tab key to add additional rows.</p> |  |  |  |  |  |  |
|                                                                                                                                                                                             |                                                                                                                                                                                |                                                                                                                                                                                                                                                                                                                                                                                                                                                                                 |                                                                                     |             |                                                                                                                                                                                             |             |  |  |                                                                                                                                                                                                                                                                                                  |  |  |  |  |  |  |
|                                                                                                                                                                                             |                                                                                                                                                                                |                                                                                                                                                                                                                                                                                                                                                                                                                                                                                 |                                                                                     |             |                                                                                                                                                                                             |             |  |  |                                                                                                                                                                                                                                                                                                  |  |  |  |  |  |  |
|                                                                                                                                                                                             |                                                                                                                                                                                |                                                                                                                                                                                                                                                                                                                                                                                                                                                                                 |                                                                                     |             |                                                                                                                                                                                             |             |  |  |                                                                                                                                                                                                                                                                                                  |  |  |  |  |  |  |
|                                                                                                                                                                                             |                                                                                                                                                                                |                                                                                                                                                                                                                                                                                                                                                                                                                                                                                 |                                                                                     |             |                                                                                                                                                                                             |             |  |  |                                                                                                                                                                                                                                                                                                  |  |  |  |  |  |  |
|                                                                                                                                                                                             |                                                                                                                                                                                |                                                                                                                                                                                                                                                                                                                                                                                                                                                                                 |                                                                                     |             |                                                                                                                                                                                             |             |  |  |                                                                                                                                                                                                                                                                                                  |  |  |  |  |  |  |
|                                                                                                                                                                                             |                                                                                                                                                                                |                                                                                                                                                                                                                                                                                                                                                                                                                                                                                 |                                                                                     |             |                                                                                                                                                                                             |             |  |  |                                                                                                                                                                                                                                                                                                  |  |  |  |  |  |  |
| <b>Time frame: past 36 months</b>                                                                                                                                                           |                                                                                                                                                                                |                                                                                                                                                                                                                                                                                                                                                                                                                                                                                 |                                                                                     |             |                                                                                                                                                                                             |             |  |  |                                                                                                                                                                                                                                                                                                  |  |  |  |  |  |  |
| <b>2</b>                                                                                                                                                                                    | Grants or contracts from any entity (if not indicated in item #1 above).                                                                                                       | <input type="checkbox"/> <b>None</b><br><table border="1" style="width: 100%; margin-top: 5px;"> <tr> <td style="width: 60%;">UKRI project grant for STRIDE project</td> <td>Paid to ADI</td> </tr> <tr> <td>ADI is funded by a number of commercial entities including: Roche, Otsuka, Biogen, Lilly, Eisai, Novo Nordisk. For full list, please see <a href="http://www.alzint.org">www.alzint.org</a></td> <td>Paid to ADI</td> </tr> <tr><td> </td><td> </td></tr> </table> | UKRI project grant for STRIDE project                                               | Paid to ADI | ADI is funded by a number of commercial entities including: Roche, Otsuka, Biogen, Lilly, Eisai, Novo Nordisk. For full list, please see <a href="http://www.alzint.org">www.alzint.org</a> | Paid to ADI |  |  | <table border="1" style="width: 100%; margin-top: 5px;"> <tr><td style="width: 60%;"></td><td></td></tr> <tr><td></td><td></td></tr> <tr><td></td><td></td></tr> </table>                                                                                                                        |  |  |  |  |  |  |
| UKRI project grant for STRIDE project                                                                                                                                                       | Paid to ADI                                                                                                                                                                    |                                                                                                                                                                                                                                                                                                                                                                                                                                                                                 |                                                                                     |             |                                                                                                                                                                                             |             |  |  |                                                                                                                                                                                                                                                                                                  |  |  |  |  |  |  |
| ADI is funded by a number of commercial entities including: Roche, Otsuka, Biogen, Lilly, Eisai, Novo Nordisk. For full list, please see <a href="http://www.alzint.org">www.alzint.org</a> | Paid to ADI                                                                                                                                                                    |                                                                                                                                                                                                                                                                                                                                                                                                                                                                                 |                                                                                     |             |                                                                                                                                                                                             |             |  |  |                                                                                                                                                                                                                                                                                                  |  |  |  |  |  |  |
|                                                                                                                                                                                             |                                                                                                                                                                                |                                                                                                                                                                                                                                                                                                                                                                                                                                                                                 |                                                                                     |             |                                                                                                                                                                                             |             |  |  |                                                                                                                                                                                                                                                                                                  |  |  |  |  |  |  |
|                                                                                                                                                                                             |                                                                                                                                                                                |                                                                                                                                                                                                                                                                                                                                                                                                                                                                                 |                                                                                     |             |                                                                                                                                                                                             |             |  |  |                                                                                                                                                                                                                                                                                                  |  |  |  |  |  |  |
|                                                                                                                                                                                             |                                                                                                                                                                                |                                                                                                                                                                                                                                                                                                                                                                                                                                                                                 |                                                                                     |             |                                                                                                                                                                                             |             |  |  |                                                                                                                                                                                                                                                                                                  |  |  |  |  |  |  |
|                                                                                                                                                                                             |                                                                                                                                                                                |                                                                                                                                                                                                                                                                                                                                                                                                                                                                                 |                                                                                     |             |                                                                                                                                                                                             |             |  |  |                                                                                                                                                                                                                                                                                                  |  |  |  |  |  |  |
| <b>3</b>                                                                                                                                                                                    | Royalties or licenses                                                                                                                                                          | <input checked="" type="checkbox"/> <b>None</b><br><table border="1" style="width: 100%; height: 40px; margin-top: 5px;"> <tr><td style="width: 60%;"></td><td></td></tr> <tr><td></td><td></td></tr> <tr><td></td><td></td></tr> </table>                                                                                                                                                                                                                                      |                                                                                     |             |                                                                                                                                                                                             |             |  |  | <table border="1" style="width: 100%; height: 40px; margin-top: 5px;"> <tr><td style="width: 60%;"></td><td></td></tr> <tr><td></td><td></td></tr> <tr><td></td><td></td></tr> </table>                                                                                                          |  |  |  |  |  |  |
|                                                                                                                                                                                             |                                                                                                                                                                                |                                                                                                                                                                                                                                                                                                                                                                                                                                                                                 |                                                                                     |             |                                                                                                                                                                                             |             |  |  |                                                                                                                                                                                                                                                                                                  |  |  |  |  |  |  |
|                                                                                                                                                                                             |                                                                                                                                                                                |                                                                                                                                                                                                                                                                                                                                                                                                                                                                                 |                                                                                     |             |                                                                                                                                                                                             |             |  |  |                                                                                                                                                                                                                                                                                                  |  |  |  |  |  |  |
|                                                                                                                                                                                             |                                                                                                                                                                                |                                                                                                                                                                                                                                                                                                                                                                                                                                                                                 |                                                                                     |             |                                                                                                                                                                                             |             |  |  |                                                                                                                                                                                                                                                                                                  |  |  |  |  |  |  |
|                                                                                                                                                                                             |                                                                                                                                                                                |                                                                                                                                                                                                                                                                                                                                                                                                                                                                                 |                                                                                     |             |                                                                                                                                                                                             |             |  |  |                                                                                                                                                                                                                                                                                                  |  |  |  |  |  |  |
|                                                                                                                                                                                             |                                                                                                                                                                                |                                                                                                                                                                                                                                                                                                                                                                                                                                                                                 |                                                                                     |             |                                                                                                                                                                                             |             |  |  |                                                                                                                                                                                                                                                                                                  |  |  |  |  |  |  |
|                                                                                                                                                                                             |                                                                                                                                                                                |                                                                                                                                                                                                                                                                                                                                                                                                                                                                                 |                                                                                     |             |                                                                                                                                                                                             |             |  |  |                                                                                                                                                                                                                                                                                                  |  |  |  |  |  |  |

|    |                                                                                                              | Name all entities with whom you have this relationship or indicate none (add rows as needed) | Specifications/Comments (e.g., if payments were made to you or to your institution) |
|----|--------------------------------------------------------------------------------------------------------------|----------------------------------------------------------------------------------------------|-------------------------------------------------------------------------------------|
| 4  | Consulting fees                                                                                              | <input checked="" type="checkbox"/> None                                                     |                                                                                     |
|    |                                                                                                              |                                                                                              |                                                                                     |
|    |                                                                                                              |                                                                                              |                                                                                     |
|    |                                                                                                              |                                                                                              |                                                                                     |
| 5  | Payment or honoraria for lectures, presentations, speakers bureaus, manuscript writing or educational events | <input checked="" type="checkbox"/> None                                                     |                                                                                     |
|    |                                                                                                              |                                                                                              |                                                                                     |
|    |                                                                                                              |                                                                                              |                                                                                     |
|    |                                                                                                              |                                                                                              |                                                                                     |
| 6  | Payment for expert testimony                                                                                 | <input checked="" type="checkbox"/> None                                                     |                                                                                     |
|    |                                                                                                              |                                                                                              |                                                                                     |
|    |                                                                                                              |                                                                                              |                                                                                     |
|    |                                                                                                              |                                                                                              |                                                                                     |
| 7  | Support for attending meetings and/or travel                                                                 | <input type="checkbox"/> None                                                                |                                                                                     |
|    |                                                                                                              | Roche                                                                                        | Payment to ADI                                                                      |
|    |                                                                                                              | Parexel                                                                                      | Travel costs to me directly                                                         |
|    |                                                                                                              | Alzheimer Association for AAIC satellite in Kenya                                            | Payment to ADI                                                                      |
|    |                                                                                                              | Walking the Talk for Dementia                                                                | Payment to ADI                                                                      |
| 8  | Patents planned, issued or pending                                                                           | <input checked="" type="checkbox"/> None                                                     |                                                                                     |
|    |                                                                                                              |                                                                                              |                                                                                     |
|    |                                                                                                              |                                                                                              |                                                                                     |
|    |                                                                                                              |                                                                                              |                                                                                     |
| 9  | Participation on a Data Safety Monitoring Board or Advisory Board                                            | <input checked="" type="checkbox"/> None                                                     |                                                                                     |
|    |                                                                                                              |                                                                                              |                                                                                     |
|    |                                                                                                              |                                                                                              |                                                                                     |
|    |                                                                                                              |                                                                                              |                                                                                     |
| 10 | Leadership or fiduciary role in other board, society, committee or advocacy group, paid or unpaid            | <input checked="" type="checkbox"/> None                                                     |                                                                                     |
|    |                                                                                                              |                                                                                              |                                                                                     |
|    |                                                                                                              |                                                                                              |                                                                                     |
|    |                                                                                                              |                                                                                              |                                                                                     |

|           |                                                                                  | Name all entities with whom you have this relationship or indicate none (add rows as needed)                                                                                                                                                                                                                         | Specifications/Comments (e.g., if payments were made to you or to your institution) |  |  |  |  |  |  |
|-----------|----------------------------------------------------------------------------------|----------------------------------------------------------------------------------------------------------------------------------------------------------------------------------------------------------------------------------------------------------------------------------------------------------------------|-------------------------------------------------------------------------------------|--|--|--|--|--|--|
| <b>11</b> | Stock or stock options                                                           | <input checked="" type="checkbox"/> <b>None</b><br><table border="1" style="width: 100%; border-collapse: collapse;"> <tr><td style="width: 50%; height: 15px;"></td><td style="width: 50%;"></td></tr> <tr><td style="height: 15px;"></td><td></td></tr> <tr><td style="height: 15px;"></td><td></td></tr> </table> |                                                                                     |  |  |  |  |  |  |
|           |                                                                                  |                                                                                                                                                                                                                                                                                                                      |                                                                                     |  |  |  |  |  |  |
|           |                                                                                  |                                                                                                                                                                                                                                                                                                                      |                                                                                     |  |  |  |  |  |  |
|           |                                                                                  |                                                                                                                                                                                                                                                                                                                      |                                                                                     |  |  |  |  |  |  |
| <b>12</b> | Receipt of equipment, materials, drugs, medical writing, gifts or other services | <input checked="" type="checkbox"/> <b>None</b><br><table border="1" style="width: 100%; border-collapse: collapse;"> <tr><td style="width: 50%; height: 15px;"></td><td style="width: 50%;"></td></tr> <tr><td style="height: 15px;"></td><td></td></tr> <tr><td style="height: 15px;"></td><td></td></tr> </table> |                                                                                     |  |  |  |  |  |  |
|           |                                                                                  |                                                                                                                                                                                                                                                                                                                      |                                                                                     |  |  |  |  |  |  |
|           |                                                                                  |                                                                                                                                                                                                                                                                                                                      |                                                                                     |  |  |  |  |  |  |
|           |                                                                                  |                                                                                                                                                                                                                                                                                                                      |                                                                                     |  |  |  |  |  |  |
| <b>13</b> | Other financial or non-financial interests                                       | <input checked="" type="checkbox"/> <b>None</b><br><table border="1" style="width: 100%; border-collapse: collapse;"> <tr><td style="width: 50%; height: 15px;"></td><td style="width: 50%;"></td></tr> <tr><td style="height: 15px;"></td><td></td></tr> <tr><td style="height: 15px;"></td><td></td></tr> </table> |                                                                                     |  |  |  |  |  |  |
|           |                                                                                  |                                                                                                                                                                                                                                                                                                                      |                                                                                     |  |  |  |  |  |  |
|           |                                                                                  |                                                                                                                                                                                                                                                                                                                      |                                                                                     |  |  |  |  |  |  |
|           |                                                                                  |                                                                                                                                                                                                                                                                                                                      |                                                                                     |  |  |  |  |  |  |

**Please place an "X" next to the following statement to indicate your agreement:**

I certify that I have answered every question and have not altered the wording of any of the questions on this form.

## ICMJE DISCLOSURE FORM

**Date:** 11/6/2023

**Your Name:** Jeffrey Cummings

**Manuscript Title:** The Association Between Clinical Dementia Rating and Clinical Outcomes in Alzheimer's Disease

**Manuscript Number (if known):** DADM-D-23-00125

In the interest of transparency, we ask you to disclose all relationships/activities/interests listed below that are related to the content of your manuscript. "Related" means any relation with for-profit or not-for-profit third parties whose interests may be affected by the content of the manuscript. Disclosure represents a commitment to transparency and does not necessarily indicate a bias. If you are in doubt about whether to list a relationship/activity/interest, it is preferable that you do so.

The author's relationships/activities/interests should be defined broadly. For example, if your manuscript pertains to the epidemiology of hypertension, you should declare all relationships with manufacturers of antihypertensive medication, even if that medication is not mentioned in the manuscript.

In item #1 below, report all support for the work reported in this manuscript without time limit. For all other items, the time frame for disclosure is the past 36 months.

|                                                                                                     |                                                                                                                                                                                | Name all entities with whom you have this relationship or indicate none (add rows as needed) | Specifications/Comments (e.g., if payments were made to you or to your institution)                                                                                                                                                                                                                                                                                                                                                                                  |                                                                                                     |  |  |  |  |                                           |
|-----------------------------------------------------------------------------------------------------|--------------------------------------------------------------------------------------------------------------------------------------------------------------------------------|----------------------------------------------------------------------------------------------|----------------------------------------------------------------------------------------------------------------------------------------------------------------------------------------------------------------------------------------------------------------------------------------------------------------------------------------------------------------------------------------------------------------------------------------------------------------------|-----------------------------------------------------------------------------------------------------|--|--|--|--|-------------------------------------------|
| <b>Time frame: Since the initial planning of the work</b>                                           |                                                                                                                                                                                |                                                                                              |                                                                                                                                                                                                                                                                                                                                                                                                                                                                      |                                                                                                     |  |  |  |  |                                           |
| <b>1</b>                                                                                            | All support for the present manuscript (e.g., funding, provision of study materials, medical writing, article processing charges, etc.)<br><b>No time limit for this item.</b> | <input type="checkbox"/> <b>None</b>                                                         | <table border="1" style="width: 100%; border-collapse: collapse;"> <tr> <td style="width: 60%; padding: 2px;">NIGMS grant: P20GM109025; NIA grants: R01AG053798, P20AG068053, R35AG71476; NINDS grant U01NS093334</td> <td style="width: 40%;"></td> </tr> <tr> <td style="height: 20px;"></td> <td></td> </tr> <tr> <td style="height: 20px;"></td> <td style="text-align: center; font-size: small;">Click the tab key to add additional rows.</td> </tr> </table> | NIGMS grant: P20GM109025; NIA grants: R01AG053798, P20AG068053, R35AG71476; NINDS grant U01NS093334 |  |  |  |  | Click the tab key to add additional rows. |
| NIGMS grant: P20GM109025; NIA grants: R01AG053798, P20AG068053, R35AG71476; NINDS grant U01NS093334 |                                                                                                                                                                                |                                                                                              |                                                                                                                                                                                                                                                                                                                                                                                                                                                                      |                                                                                                     |  |  |  |  |                                           |
|                                                                                                     |                                                                                                                                                                                |                                                                                              |                                                                                                                                                                                                                                                                                                                                                                                                                                                                      |                                                                                                     |  |  |  |  |                                           |
|                                                                                                     | Click the tab key to add additional rows.                                                                                                                                      |                                                                                              |                                                                                                                                                                                                                                                                                                                                                                                                                                                                      |                                                                                                     |  |  |  |  |                                           |
| <b>Time frame: past 36 months</b>                                                                   |                                                                                                                                                                                |                                                                                              |                                                                                                                                                                                                                                                                                                                                                                                                                                                                      |                                                                                                     |  |  |  |  |                                           |
| <b>2</b>                                                                                            | Grants or contracts from any entity (if not indicated in item #1 above).                                                                                                       | <input checked="" type="checkbox"/> <b>None</b>                                              | <table border="1" style="width: 100%; border-collapse: collapse;"> <tr> <td style="width: 60%; height: 20px;"></td> <td style="width: 40%;"></td> </tr> <tr> <td style="height: 20px;"></td> <td></td> </tr> <tr> <td style="height: 20px;"></td> <td></td> </tr> </table>                                                                                                                                                                                           |                                                                                                     |  |  |  |  |                                           |
|                                                                                                     |                                                                                                                                                                                |                                                                                              |                                                                                                                                                                                                                                                                                                                                                                                                                                                                      |                                                                                                     |  |  |  |  |                                           |
|                                                                                                     |                                                                                                                                                                                |                                                                                              |                                                                                                                                                                                                                                                                                                                                                                                                                                                                      |                                                                                                     |  |  |  |  |                                           |
|                                                                                                     |                                                                                                                                                                                |                                                                                              |                                                                                                                                                                                                                                                                                                                                                                                                                                                                      |                                                                                                     |  |  |  |  |                                           |
| <b>3</b>                                                                                            | Royalties or licenses                                                                                                                                                          | <input type="checkbox"/> <b>None</b>                                                         | <table border="1" style="width: 100%; border-collapse: collapse;"> <tr> <td style="width: 60%; padding: 2px;">Ownership of Neuropsychiatric Inventory (NPI) copyright.</td> <td style="width: 40%;"></td> </tr> <tr> <td style="height: 20px;"></td> <td></td> </tr> <tr> <td style="height: 20px;"></td> <td></td> </tr> </table>                                                                                                                                   | Ownership of Neuropsychiatric Inventory (NPI) copyright.                                            |  |  |  |  |                                           |
| Ownership of Neuropsychiatric Inventory (NPI) copyright.                                            |                                                                                                                                                                                |                                                                                              |                                                                                                                                                                                                                                                                                                                                                                                                                                                                      |                                                                                                     |  |  |  |  |                                           |
|                                                                                                     |                                                                                                                                                                                |                                                                                              |                                                                                                                                                                                                                                                                                                                                                                                                                                                                      |                                                                                                     |  |  |  |  |                                           |
|                                                                                                     |                                                                                                                                                                                |                                                                                              |                                                                                                                                                                                                                                                                                                                                                                                                                                                                      |                                                                                                     |  |  |  |  |                                           |

|   |                                                                                                              | Name all entities with whom you have this relationship or indicate none (add rows as needed)                                                                                                                                                                                                                                                                                                                                                                                                                                                 | Specifications/Comments (e.g., if payments were made to you or to your institution) |
|---|--------------------------------------------------------------------------------------------------------------|----------------------------------------------------------------------------------------------------------------------------------------------------------------------------------------------------------------------------------------------------------------------------------------------------------------------------------------------------------------------------------------------------------------------------------------------------------------------------------------------------------------------------------------------|-------------------------------------------------------------------------------------|
| 4 | Consulting fees                                                                                              | <input type="checkbox"/> <b>None</b>                                                                                                                                                                                                                                                                                                                                                                                                                                                                                                         |                                                                                     |
|   |                                                                                                              | AB Science, Acadia, Alkahest, AlphaCognition, ALZPath, Annovis, AriBio, Artery, Avanir, Biogen, Biosplice, Cassava, Cerevel, Clinilabs, Cortexyme, Diadem, EIP Pharma, Eisai, GatehouseBio, GemVax, Genentech, Green Valley, Grifols, Janssen, Karuna, Lexeo, Lilly, Lundbeck, LSP, Merck, NervGen, Novo Nordisk, Oligomerix, Otsuka, PharmacotrophiX, PRODEO, Prothena, ReMYND, Renew, Resverlogix, Roche, Signant Health, Suven, Unlearn AI, Vaxxinity, VigilNeuro, Zai Laboratories pharmaceutical, assessment, and investment companies. |                                                                                     |
|   |                                                                                                              |                                                                                                                                                                                                                                                                                                                                                                                                                                                                                                                                              |                                                                                     |
|   |                                                                                                              |                                                                                                                                                                                                                                                                                                                                                                                                                                                                                                                                              |                                                                                     |
| 5 | Payment or honoraria for lectures, presentations, speakers bureaus, manuscript writing or educational events | <input checked="" type="checkbox"/> <b>None</b>                                                                                                                                                                                                                                                                                                                                                                                                                                                                                              |                                                                                     |
|   |                                                                                                              |                                                                                                                                                                                                                                                                                                                                                                                                                                                                                                                                              |                                                                                     |
|   |                                                                                                              |                                                                                                                                                                                                                                                                                                                                                                                                                                                                                                                                              |                                                                                     |
|   |                                                                                                              |                                                                                                                                                                                                                                                                                                                                                                                                                                                                                                                                              |                                                                                     |
| 6 | Payment for expert testimony                                                                                 | <input checked="" type="checkbox"/> <b>None</b>                                                                                                                                                                                                                                                                                                                                                                                                                                                                                              |                                                                                     |
|   |                                                                                                              |                                                                                                                                                                                                                                                                                                                                                                                                                                                                                                                                              |                                                                                     |
|   |                                                                                                              |                                                                                                                                                                                                                                                                                                                                                                                                                                                                                                                                              |                                                                                     |
|   |                                                                                                              |                                                                                                                                                                                                                                                                                                                                                                                                                                                                                                                                              |                                                                                     |
| 7 | Support for attending meetings and/or travel                                                                 | <input checked="" type="checkbox"/> <b>None</b>                                                                                                                                                                                                                                                                                                                                                                                                                                                                                              |                                                                                     |
|   |                                                                                                              |                                                                                                                                                                                                                                                                                                                                                                                                                                                                                                                                              |                                                                                     |
|   |                                                                                                              |                                                                                                                                                                                                                                                                                                                                                                                                                                                                                                                                              |                                                                                     |
|   |                                                                                                              |                                                                                                                                                                                                                                                                                                                                                                                                                                                                                                                                              |                                                                                     |
| 8 | Patents planned, issued or pending                                                                           | <input checked="" type="checkbox"/> <b>None</b>                                                                                                                                                                                                                                                                                                                                                                                                                                                                                              |                                                                                     |
|   |                                                                                                              |                                                                                                                                                                                                                                                                                                                                                                                                                                                                                                                                              |                                                                                     |
|   |                                                                                                              |                                                                                                                                                                                                                                                                                                                                                                                                                                                                                                                                              |                                                                                     |
|   |                                                                                                              |                                                                                                                                                                                                                                                                                                                                                                                                                                                                                                                                              |                                                                                     |
| 9 | Participation on a Data Safety Monitoring Board or Advisory Board                                            | <input type="checkbox"/> <b>None</b>                                                                                                                                                                                                                                                                                                                                                                                                                                                                                                         |                                                                                     |
|   |                                                                                                              | Acadia, Biogen, Genentech, Grifols, Janssen, Karuna, Otsuka, reMYND, Roche, Signant Health                                                                                                                                                                                                                                                                                                                                                                                                                                                   |                                                                                     |
|   |                                                                                                              |                                                                                                                                                                                                                                                                                                                                                                                                                                                                                                                                              |                                                                                     |
|   |                                                                                                              |                                                                                                                                                                                                                                                                                                                                                                                                                                                                                                                                              |                                                                                     |

|           |                                                                                                   | Name all entities with whom you have this relationship or indicate none (add rows as needed)                    | Specifications/Comments (e.g., if payments were made to you or to your institution) |
|-----------|---------------------------------------------------------------------------------------------------|-----------------------------------------------------------------------------------------------------------------|-------------------------------------------------------------------------------------|
|           |                                                                                                   |                                                                                                                 |                                                                                     |
| <b>10</b> | Leadership or fiduciary role in other board, society, committee or advocacy group, paid or unpaid | <input checked="" type="checkbox"/> <b>None</b>                                                                 |                                                                                     |
|           |                                                                                                   |                                                                                                                 |                                                                                     |
|           |                                                                                                   |                                                                                                                 |                                                                                     |
| <b>11</b> | Stock or stock options                                                                            | <input type="checkbox"/> <b>None</b>                                                                            |                                                                                     |
|           |                                                                                                   | ADAMAS, Acumen, Alkahest, Alzheon, AnnovisBio, Behren Therapeutics, BIOasis, MedAvante, and United Neuroscience |                                                                                     |
|           |                                                                                                   |                                                                                                                 |                                                                                     |
|           |                                                                                                   |                                                                                                                 |                                                                                     |
| <b>12</b> | Receipt of equipment, materials, drugs, medical writing, gifts or other services                  | <input checked="" type="checkbox"/> <b>None</b>                                                                 |                                                                                     |
|           |                                                                                                   |                                                                                                                 |                                                                                     |
|           |                                                                                                   |                                                                                                                 |                                                                                     |
| <b>13</b> | Other financial or non-financial interests                                                        | <input type="checkbox"/> <b>None</b>                                                                            |                                                                                     |
|           |                                                                                                   | Chief Scientific Advisor – CNS Innovations, LLC.                                                                |                                                                                     |
|           |                                                                                                   |                                                                                                                 |                                                                                     |
|           |                                                                                                   |                                                                                                                 |                                                                                     |

Please place an "X" next to the following statement to indicate your agreement:

I certify that I have answered every question and have not altered the wording of any of the questions on this form.
